1 **SEMA3F-deficient colorectal cancer cells Promote**  
2 **lymphangiogenesis: fatty acid metabolism replace glycolysis for**  
3 **energy supply during lymphatic endothelial cells proliferation in**  
4 **tumor hypoxia microenvironment**

5

6 xiaoyuan Fu<sup>1,2†</sup>, Miaomiao Tao<sup>1,†</sup>, Hongbo Ma<sup>1,†</sup>, Cancan Wang<sup>1</sup>, Yanyan  
7 Li<sup>1</sup>, Xiaoqiao Hu<sup>1</sup>, Xiurong Qin<sup>1</sup>, Renming Lv<sup>1</sup>, Gengdou Zhou<sup>1</sup>, Jun  
8 Wang<sup>1</sup>, Meiyu Zhou<sup>1</sup>, Guofa Xu<sup>1</sup>, Zexin Wan<sup>1g</sup>, Min Chen<sup>1,\*,§</sup> and Qi  
9 Zhou<sup>1,\*\*,§</sup>

10

11 <sup>1</sup>Department of oncology, Fuling Central Hospital of Chongqing City,  
12 Chongqing 408099, China

13 <sup>2</sup>Department of Pathology, Chongqing Medical and Health School,  
14 Chongqing 408000, China

15 \*Corresponding author. Tel: +86- 23- 72242242; Fax: +86 -23-72224460,  
16 E-mail address: 2099780278@qq.com.

17 \*\*Corresponding author. Tel: +86- 23- 72242242; Fax: +86-23-72224460,  
18 E-mail address: qizhou112@163.com.

19 † These authors contributed equally to this work as first authors

20 § These authors contributed equally to this work as corresponding authors

21

22

23 **Abstract**

24 lymphangiogenesis as a process is colorectal cancer first metastasis via  
25 lymphatic vessels to proximal lymph nodes. The fuel metabolism in  
26 mitochondrial and support proliferation of lymphatic endothelial cells  
27 (LECs) remain elusive during lymphangiogenesis in tumor hypoxic  
28 microenvironment. Recent studies report that loss of SEMA3F critically  
29 contributes to lymphangiogenesis of the CRCs. Here, we silenced  
30 SEMA3F expression of CRCs and co-culture with hLECs, the  
31 tubulogenesis capacity and hLECs migration were escalated in the  
32 hypoxia, the hLECs mainly relied on fatty acid metabolism not aerobic  
33 glycolysis during lymphangiogenesis. SEMA3F-deficient CRCs  
34 up-regulated PMAKP expression and phosphorylation of hLECs, and  
35 activated its peroxisome proliferator-activated receptor (PPARs) and  
36 Peroxisome proliferator-activated receptor gamma coactivator-1 alpha  
37 (PGC-1a) facilitated their switched toward fatty acids (FA) catabolism.  
38 Furthermore, we observed that activation of the PGC1-PPAR lipid  
39 oxidation signaling pathway in hLECs was caused by the secretion of  
40 interleukin-6 by tumor cells. Taken together, this study indicates that  
41 CRCs with SEMA3F expression depletion significantly promotes  
42 lymphangiogenesis in hypoxia and facilitates *the* secretion of IL-6 in  
43 tumor cell, and activates mitochondria fatty acids oxidation (FAO)  
44 reaction in the hLECs by PGC1-PPAR signaling pathways to support its  
45 growth.

46

47 **Keywords:** Semaphorin-3F; colon cancer cells; lymphangiogenesis; fatty  
48 acid metabolism; hypoxia

49

## 50 **Introduction**

51 The growth and metastatic of colorectal adenocarcinoma (CRC) often  
52 are the leading cause of mortality in patients, colorectal cancers  
53 metastasis lead spread of cancer cells, where cancer cells often  
54 disseminate through blood and lymphatic vessels (Hanahan and Weinberg,  
55 2011; Ma *et al*,2018). Lymphatic invasion is one of the most events and  
56 lymph node involvement represents one of the most important prognostic  
57 factors of poor clinical outcome in patients with CRC (Royston and  
58 Jackson, 2009; Sakurai *et al*,2012; Veronese *et al*,2016; Vellinga *et*  
59 *al*,2017). However, the role of lymphangiogenesis and the molecular  
60 mechanisms underlying lymphangiogenesis in cancer remains largely  
61 elusive, such as interactions among lymphatic endothelial cells, tumor  
62 cells, and other components within the tumor microenvironment (TME).  
63 Specifically, the common features in solid tumors TME is hypoxia and  
64 acidosis, the lymphatic endothelial cells (LECs) energy metabolism and  
65 it's proliferation are far from full understand. Although the molecular  
66 mechanisms angiogenesis is required for solid tumors is well known.

67 Class III semaphorins is involved in tumor angiogenesis, lymphatic  
68 vessels formation and axonal guidance regulation (Tessier-Lavigne and  
69 Goodman,1996; Tran *et al*,2009). semaphorin-3F (SEMA3F) is a member  
70 of the semaphorin-3 family(Chen *et al*,1998;Bielenberg *et al*,2004; Fu  
71 and Ip,2017), This secreted semaphorins, acting via binding neuropilins  
72 (NRPs), Chemorepulsive for vascular endothelial cells and lymphatic  
73 endothelial cells expressing Neuropilin-2 (NRP2) (Bielenberg *et al*,2004;  
74 Doçi *et al*,2015). SEMA3F has higher binding affinity for NRP2, the  
75 recombinant SEMA3F promotes LECs collapse and potently inhibits  
76 lymphangiogenesis in vivo, and the SEMA3F re-expression diminishes  
77 lymphangiogenesis and lymph node metastasis in vitro (He and  
78 Tessier-Lavigne, 1997; Bielenberg *et al*,2004; Klagsbrun and Shimizu,  
79 2010; Sakurai *et al*,2012) . In our previous study, loss of SEMA3F, the  
80 inhibitory ligand of NRP2, critically contributes to CRCs metastasis (Wu  
81 *et al*, 2011). Furthermore, our previous study has demonstrated that NRP2  
82 significantly increased CRCs lymphangiogenesis and induced the  
83 activation of NRP2 in hLECs to promote tumor lymphangiogenesis via  
84 integrin $\alpha$ 9 $\beta$ 1/FAK/Erk pathway independent VEGF-C/VEGFR3 signaling  
85 (Ou *et al*, 2015). It suggest that SEMA3F maybe an  
86 anti-lymphangiogenic metastasis suppressor during cancer progression.  
87 Intriguingly, The class 3 semaphorins was initially identified as axonal  
88 repellents and acted via NRPs, suppressed axons from growing sensory,

89 sympathetic, and motor neurons (Lumb *et al*, 2018; Inokuchi *et al*, 2017;  
90 Takeuchi *et al*, 2010). In early studies, SEMA3F via Neuropilin-2, to  
91 repulsive sensory and sympathetic axon repulsion, principally responsible  
92 for mediating responses SEMA3F was Plexin-A3 ( Coate *et al*, 2015;  
93 Wang *et al*, 2017). Recent evidence pointed to that the sympathetic  
94 nervous system (SNS) could control brown adipose tissue function and  
95 energy homeostasis (Nakamura *et al*, 2017; Riera *et al*, 2017; Owen *et al*,  
96 2014; Morrison *et al*, 2014). It suggest sympathetic nerve implicate lipid  
97 metabolism, it also suggest SEMA3F maybe has potential role in energy  
98 availability. The other studies demonstrate the epigenetics may control  
99 differentiation and fatty acid metabolism of LECs ( Wong *et al*, 2017; van  
100 der Klaauw *et al*, 2019). So, We hypothesize that SEMA3F binding  
101 NRP2 to reduce lymphangiogenesis of CRCs maybe has other  
102 mechanisms, SEMA3F may bind NRP2 to disturb lipid metabolism of  
103 LECs and repress lymphangiogenesis of CRCs .  
104 In this study, we examined the role of SEMA3F expression deficient  
105 CRCs promotion hLECs lipid metabolism and lymphangiogenesis under  
106 hypoxemia. We demonstrated that SEMA3F plays a crucial role in hLECs  
107 energy metabolism. CRCs with SEMA3F expression depletion  
108 significantly promotes hLECs migration and tubulogenesis capacity in  
109 hypoxia, and enhance the lipid metabolism via suppressing aerobic  
110 glycolysis of hLECs, and the lipid metabolism to induce the PGC1-PPAR

111 signaling pathway in hLECs. Further evidence demonstrated that CRCs  
112 cell with SEMA3F expression depletion up-regulated its IL-6 secretion,  
113 to activate the PGC1-PPAR signaling pathway and induces the lipid  
114 metabolism in hLECs in hypoxia. Our findings for the first time  
115 revealed a novel role and the underlying mechanism, the CRCs cell with  
116 SEMA3F expression deficiency was involved the energy metabolism  
117 with hLECs in the hypoxia environment, and induce tumor  
118 lymphangiogenesis of CRCs to promote lymphatic metastasis.

119

## 120 **Result**

### 121 **1.SEMA 3F-deficient CRCs further enhance lymphangiogenesis** 122 **under hypoxic conditions**

123 In our previous study, loss of SEMA3F expression, the inhibitory ligand  
124 of NRP2, critically contributes to CRCs metastasis and  
125 lymphangiogenesis in normoxia(Wu *et al*, 2011; Ou *et al*, 2015). To  
126 examine whether SEMA3F loss expression plays any roles in induce  
127 lymphangiogenesis of colorectal cancer cell in hypoxia, We used  
128 supernatants of the colorectal adenocarcinoma cell line HCT116 with  
129 SEMA3F expression and SEMA3F knockout (SEMA3F KD), to culture  
130 hLECs three-dimensionally on matrigel substrate under normoxia and  
131 hypoxia to induce tubule formation of hLECs. The tubulogenesis of  
132 hLECs was improved in hypoxia than that in normoxia ( $p < 0.001$ ; Figure

133 1A and B). Strikingly, comparing with control cells, SEMA3F KD groups  
134 displayed significantly enhancement of tubulogenesis ability of hLECs  
135 under normoxic conditions. Consistent with normoxic conditions  
136 culture, SEMA3F KD groups had stronger ability to induce hLECs tubule  
137 formation than SEMA3F expression groups in hypoxia. We used a  
138 co-cultured system consisting both hLECs and CRCs with transwell  
139 chambers respectively in normoxic and hypoxic conditions culture to  
140 induce migration of hLECs. It had been shown that (Figure 1C) SEMA3F  
141 KD groups promoted migration of hLECs in normoxia, furthermore,  
142 SEMA3F KD groups further enhanced capability of hLECs migration in  
143 hypoxia. These effects indicated loss of SEMA3F, CRCs further  
144 promoted lymphangiogenesis in hypoxia.

145 To gain further cause insight about promotion of lymphangiogenesis, we  
146 further confirmed with flow cytometry assessment that the apoptosis rate  
147 of hLECs in SEMA3F KD groups was lower than it of control groups in  
148 hypoxia ( $p < 0.005$ ; Figure 1D). We then measured apoptosis and  
149 proliferation relative gene expression levels of hLECs, it showed the  
150 expression level of pro-apoptotic protein Caspase3 and 9, and the main  
151 shearing object poly ADP-ribose polymerase (PARP) of caspase 3 was  
152 decreased (Figure 1E) in SEMA3F KD groups, but the anti-apoptotic  
153 protein BCL-2 still was decreased. However, the expression level  
154 reduction in the SEMA3F KD groups was more pronounced than in the

155 control groups, which may be the reason for the lower apoptotic rate in  
156 the SEMA3F KD groups. In addition, the expression of cyclinD1 was  
157 up-regulated in SEMA3F KD groups under hypoxic condition, which  
158 significantly increased the proportion of G1 phase hLECs and promoted  
159 the proliferation of hLECs(Figure 1F and G), not cyclinD2. Thses effects  
160 revealed SEMA3F deficiency in CRCs could further enhance  
161 lymphangiogenesis in the hypoxia compared to the normoxic conditions  
162 via promotion hLECs proliferation, not influence its apoptosis.

163

## 164 **2. SEMA 3F-deficient CRCs promote lipid peroxidation of** 165 **mitochondria in LECs at the hypoxic conditions**

166 To explored causal of energy supply of hLECs proliferation when we  
167 silenced SEMA 3F expression in CRCs, we employed the CRCs which  
168 was control groups and respectively co-culture with hLECs in hypoxia.  
169 Interestingly, we found that the triglycerides level in hLECs which  
170 co-culture with SEMA3F KD-CRCs groups was three times higher than  
171 control groups, but the free cholesterol, total cholesterol and  
172 phospholipids level were no difference between the two hLECs groups  
173 ( $P<0.05$ ;Figure 2A), it showed SEMA3F KD-CRCs groups increased  
174 hLECs cellular content of triglycerides in hypoxia. We presumed that the  
175 energy supply that SEMA3F KD-CRCs could induce hLECs  
176 proliferation under hypoxia was derived from fat metabolism. Thus, we



177 detected the protein expression level of fat metabolism enzyme in two  
178 hLECs groups with western blot. As expected, the triglyceride synthesis  
179 genes such as glycerol-3-phosphate acyltransferase (GPAT) and  
180 phospholipase C(PLC) expression level of hLECs co-culture with  
181 SEMA3F KD-CRCs groups were increased obviously than control groups  
182 at hypoxia(Figure 2B left). These data demonstrated that SEMA3F  
183 KD-CRCs enhanced hLECs triglyceride synthesis and acted on first  
184 committed step of their synthesis, it is the acylation of GPAT enzymes via  
185 the glycerol phosphate pathwayphosphatidylinositol (PI)-specific  
186 phospholipase C (PLC), which reside in the endoplasmic reticulum (ER)  
187 and mitochondria (Cao et al,2006; Ohba et al,2013; Nagarajan *et al*,2017;  
188 Tang *et al*,2017). Consistent with results of immunofluorescence  
189 examination showed that the activity of mitochondria in hLECs which  
190 co-culture with SEMA3F KD-CRCs groups was higher than control  
191 group ( $p<0.001$ ;Figure 2C and F) .

192 We then tested situation of hLECs lipolysis, which co-culture with  
193 SEMA3F KD groups, to explore it energy supply in hypoxia. Shown in  
194 Figure 2B right, the catabolism relative genes adipose triglyceride  
195 lipase(ATGL),diacylglycerol lipase( DAGL) and comparative gene  
196 identification-58(CGI-58) expression level of hLECs was significantly  
197 increased in SEMA3F KD groups than those in control groups. These  
198 data indicated to knock down SEMA3F of CRCs could promote

199 mitochondria lipid oxidation in hLECs at hypoxia. In order to further  
200 clarify the role of SEMA3F KD-CRCs promote mitochondria lipid  
201 oxidation in hLECs at hypoxia, we inhibited metabolism of LECs using  
202 the inhibitor of three respiratory chain complex oligomycin and  
203 antimycin A & rotenone. Our results showed that Oligomycin and  
204 Antimycin A & Rotenone level in hLECs which co-culture with SEMA3F  
205 KD-CRCs groups were respectively two times and three times comparing  
206 with control groups( $P<0.05$ ;Figure 2D), however, it was not difference of  
207 Fccp between two groups at hypoxia. It indicated the respiratory  
208 functions in hLECs which co-culture with SEMA3F KD-CRCs groups  
209 was much stronger than control groups. Moreover, the concentration of  
210 CO<sub>2</sub> productions in hLECs which co-culture with SEMA3F KD-CRCs  
211 groups was three times higher than control groups ( $P<0.01$ ; Figure 2E). It  
212 indicated that to knock down SEMA3F of CRCs could promote LECs  
213 proliferation in hypoxia, it was by promoting their mitochondria lipid  
214 oxidation to gain energy.

215

### 216 **3. SEMA 3F-deficient CRCs suppress glycolysis metabolism of LECs** 217 **in hypoxia**

218 It is well known that the major energy supply mode of cell is glycolysis  
219 when it is in hypoxia.To knock down SEMA3F of CRCs whether can  
220 promote glycometabolism of mitochondria in hLECs at hypoxia? The

221 first rate-limiting step in glucose utilization in cells is facilitation glucose  
222 transport(Birsoy *et al*,2014;Nagarajan *et al*,2017; Tang *et al*,2017). In  
223 present study, we examined the expression of the glucose transporter  
224 protein1 (GLUT1) in the hLECs of co-culture with SEMA3F KD-CRCs  
225 groups and control groups in hypoxia. The western blotting results  
226 showed the GLUT1 protein expression level was reduced in SEMA3F  
227 KD groups comparing that in control groups (Figure 3A). We further  
228 examined basal glucose uptake and insulin-stimulated glucose uptake of  
229 hLECs in two groups. The results showed that the basal glucose uptake  
230 and insulin-stimulated glucose uptake in SEMA3F KD groups were  
231 markedly lower than those of the controls( $P<0.05$ ;Figure 3 B). These  
232 results collectively illustrated the SEMA3F KD in CRCs repressed  
233 glucose uptake and transportation in hLECs at hypoxia.

234 To further confirm whether SEMA3F KD in CRCs inhibition glycolysis  
235 of hLECs in hypoxia, we respectively tested the L-lactate concentration  
236 of the supernatant and hLECs cell lysates in the two groups (Faubert *et*  
237 *al*,2017) . As expected, the L-lactate concentration of the supernatant and  
238 cell lysate in SEMA3F KD groups were significantly lower than those  
239 in control group ( $p<0.05$ ). Moreover, the differences was much  
240 significant with the co-culture time extension ( $p<0.05$ ;Figure 3C and D).

241 We further tested the genes expression level of glycolysis, it revealed  
242 the glycolysis relative genes expression level of hLECs co-culture with

243 SEMA3F KD-CRCs was strikingly lower comparing with control  
244 groups in hypoxia (Figure 3 E), such as hexokinase I (HK I), hexokinase  
245 II (HK II) and LDHA. In contrast, the pyruvate dehydrogenase levels  
246 was higher in SEMA3F KD groups, but Pyruvate kinase isozymes  
247 M2(PKM2) expression levels was not difference between two groups.  
248 These results suggested that level of aerobic glycolysis of LECs in  
249 SEMA3F KD groups was lower than that in control groups in hypoxia, it  
250 converted glycolysis to the Krebs cycle was not be blocked(Liu *et*  
251 *al*,2017;DeWaal *et al*,2018; Sukonina *et al*,2019). To further  
252 determination the efficacy to knock down SEMA3F of CRCs inhibition  
253 glycolysis of hLECs in hypoxia, therefore, we use 3-bromopyruvate to  
254 inhibit the glycolysis of the two groups. The result was showed in Figure  
255 3F, the apoptosis rate of hLECs in SEMA3F KD groups were  
256 significantly lower than control groups( $p < 0.01$ ), furthermore, it showed  
257 dose-effect relationship. It suggested that, in hypoxia, the energy  
258 metabolism in hLECs which co-culture with SEMA3F KD-CRCs not  
259 depended on the glycolysis, and also inhibited its glycometabolism. Its  
260 major energy supply maybe come from mitochondria lipid oxidation. our  
261 data agree with Wong *et al* report that the fatty acid oxidation (FAO) flux  
262 in LECs is even higher than in BECs while glycolytic flux is lower(Wong  
263 *et al* ,2017).

265 **4. SEMA3F-deficient CRCs promote the activation of lipid oxidation**  
266 **signaling pathway PGC1-PPAR in the hLECs under hypoxia.**

267 To confirm the energy metabolism in hLECs which co-culture with  
268 SEMA3F KD-CRCs under hypoxia come from mitochondria lipid  
269 oxidation, whether the lipid oxidation signaling pathways should be  
270 activated. So, we detected the protease expression level which was related  
271 to lipid oxidation signaling pathway in two hLECs groups. As shown in  
272 Fig.4 A , in hypoxia, adenosine 5'-monophosphate activated protein  
273 kinase (AMPK) and phospho-AMPK(P-AMPK), the metabolic sensor or  
274 "fuel gauge" ( Julien *et al* ,2017) , their expression level in hLECs which  
275 co-culture with SEMA3F KD-CRCs groups was significantly  
276 elevated,but the ratio between p-AMPK /AMPK was decreased. It  
277 indicated in the AMP:ATP ratio was increased and ATP-consuming  
278 switched to FAO and generated ATP-producing. (Weinberg *et al* ,2015)  
279 Furthermore, the expression of lipid oxidation signaling pathway relative  
280 proteases also were increased obviously such as PGC1 $\alpha$  and PPAR $\alpha$  in  
281 hLECs co-culture with SEMA3F KD-CRCs groups than those in control  
282 groups. However, the PPAR $\gamma$  was not change in two groups (Figure 4A).  
283 Simultaneously, PPAR activity of hLECs was also obviously elevated in  
284 SEMA3F KD groups(p<0.05; Figure 4B). When we silenced the  
285 AMPK $\alpha$ 1 or PGC1 $\alpha$  expression of hLECs in two groups by siRNA in  
286 hypoxia, the PPAR activity of hLECs in control groups has no changes

287 (Figure 4C), conversely, the PPAR activity in hLECs co-culture with  
288 SEMA3F KD-CRCs groups was significantly decreasing ( $p < 0.05$ ). In  
289 addition, when we silenced the AMPK $\alpha$ 1 expression, the hLECs  
290 tubulogenesis was significantly decreased at hypoxia in SEMA3F  
291 KD-CRCs co-culture groups ( $p < 0.05$ ; Figure 4D). These data showed that  
292 hypoxia maybe promote activation of AMPK in hLECs with SEMA3F  
293 KD-CRCs co-culture groups, and gain energy via their lipid oxidation  
294 signaling pathways in mitochondria. Thus, we measured the change of  
295 P-AMPK $\alpha$  and PGC1 $\alpha$  protein level in hLECs co-culture with SEMA3F  
296 KD-CRCs groups after adding PPAR  $\gamma$  antagonist at the hypoxia. After  
297 adding PPAR  $\gamma$  antagonist, the P-AMPK  $\alpha$  and PGC1  $\alpha$  expression  
298 of hLECs both decreased in SEMA3F KD groups (Figure 4E). These  
299 data suggested that in hypoxia, SEMA3F KD in CRCs enhanced hLECs  
300 mitochondria oxidation reaction via PGCI-PPAR signaling pathways.

301

302 **5. SEMA3F-deficient CRCs enhance IL-6 secretion to drive the lipid**  
303 **oxidation activation of PGCI-PPAR signaling pathway in LECs in**  
304 **hypoxia.**

305 Previous research has shown that IL-6 could promote the lipid oxidation  
306 by raising PPAR $\alpha$  in murine models of fatty liver (Hong *et al*, 2004;  
307 Awazawa *et al*, 2011). Whether SEMA3F KD in CRCs initiate the  
308 mitochondrion lipid oxidation in hLECs also by enhancing the its

309 secretion of IL-6 in hypoxia? Therefore, we tested the IL-6mRNA level  
310 of CRCs in SEMA3F KD groups when it was culture in hypoxia, it was  
311 much higher than control groups after culture for 24h ( $p<0.05$ ;Figure 5A).  
312 In order to confirm SEMA3F KD promote IL-6 secretion of CRCs at the  
313 hypoxia condition, we further tested the IL-6 level in supernatant of  
314 CRCs with SEMA3F KD groups and control CRCs groups, the result was  
315 consistent with IL-6 mRNA ( $p<0.01$ ;Figure 5B ). When we silenced the  
316 IL-6 expression of the two groups by siRNA in hypoxia, the PPAR  
317 activity of hLECs which co-culture in control CRCs groups had no  
318 changes, conversely, its activity in the SEMA3F KD-CRCs group was  
319 significantly reduced to the control groups level ( $p<0.01$ ;Figure 5C).  
320 Furthermore, when SEMA3F KD-CRCs groups loss expression of IL-6,  
321 the hLECs tubulogenesis was significantly decreased in hypoxia(Figure  
322 5D). These data showed that hypoxia conditions maybe promote secretion  
323 of IL-6 in SEMA3F-deficient CRCs, and enable hLECs mitochondria  
324 lipid oxidation to gain energy. Therefore, we measured the change of  
325 P-AMPK  $\alpha$  and PGC1  $\alpha$  protein level in hLECs co-culture with  
326 SEMA3F KD-CRCs when we blocked IL-6 activity with IL-6 antibody in  
327 hypoxia.The results showed P-AMPK $\alpha$  and PGC1 $\alpha$  protein level of  
328 hLECs were both decreased in SEMA3F KD groups (Figure 5E).  
329 Together, these data suggested that at the hypoxia, SEMA3F KD in CRCs

330 could promote the expression of IL-6, and activate PGC1-PPAR signaling  
331 pathways of hLECs to switch on mitochondria lipid oxidation reaction.

332

333 **6. The results of big data analysis indicate that the SEMA**  
334 **3F-deficient CRCs show an increase in hypoxia signal and enhanced**  
335 **self-glycolytic activity.**

336 We used gene microarray to investigate the effects of insufficient SEMA  
337 3F expression in 53 CRCs lines on angiogenesis, epithelial-mesenchymal  
338 transition, energy metabolism (such as pyruvate metabolism,  
339 tricarboxylic acid cycle, glycolysis, and fatty acid metabolism) and so on.  
340 The enrichment geneset map was drawn for big data analysis (Figure 6C).  
341 The results showed that CRCs lines with SEMA 3F expression deficiency  
342 enhanced its hypoxia signal, while induced CRCs epithelial-mesenchymal  
343 transition, and promoted angiogenesis ability in colon cancer cell lines. It  
344 indicated that the loss of SEMA3F expression could enhance the invasion  
345 and metastasis ability of CRCs lines (Figure 6A). Interestingly, the  
346 glycolysis of their own was increased, but the aerobic oxidation in  
347 mitochondrial was weakened, meanwhile, the fatty acid metabolism of  
348 CRCs was also significantly reduced (Figure 6B). Under the hypoxia,  
349 the glycolysis of CRCs with SEMA 3F KD was enhanced and consumed  
350 a large amount of sugar. It led to insufficient glucose for energy  
351 metabolism required for lymphangiogenesis and lymphatic endothelial



352 cell proliferation under hypoxia, this may be the reason why lymphatic  
353 endothelial cells take other metabolism to obtain energy. This could  
354 explain why the lipid oxidation of mitochondrial was increased while the  
355 glycolysis was decreased appeared at lymphatic endothelial cells  
356 co-culture with SEMA 3F knockout CRCs.

357

## 358 **Discussion**

359 The tumor metastatic process is a complex multistep process and  
360 lymphangiogenesis is the important steps to form distal secondary tumors  
361 (Royston *et al*,2009).The initial steps of lymphangiogenesis process that  
362 results in cancer cell induction lymphatic endothelial cells proliferation  
363 and capillary lymphatic sprouting to elongation of the branch from tumor  
364 extravasation into the distal organs (Padera *et al*,2016). Although our  
365 understanding of the biological events that energy supply contribute to  
366 the lymphatic endothelial cells proliferation is the first event of  
367 lymphangiogenesis process over the last decades, we still know very little  
368 about the molecular process that includes energy metabolism during  
369 lymphangiogenesis, particularly, the hLECs proliferation need energy  
370 supply in hypoxemia. In this study, we demonstrated that SEMA3F  
371 knockdown in CRCs significantly promoted hLECs migration and  
372 tubulogenesis capacity in hypoxia, and activation the lipid metabolism via  
373 suppressing aerobic glycolysis of hLECs. To our knowledge, this is the

374 first report demonstrating a molecular event about energy metabolism for  
375 the tumor-associated lymphangiogenesis .

376 It is well known that microenvironment of cancer is often in hypoxic, it  
377 induces cancer cell angiogenesis and lymphangiogenesis, the cancer cell  
378 proliferation need energy supply too. However, what is the source of  
379 energy for these LECs proliferation is not completely clear in hypoxia. In  
380 this study, when we silence SEMA3F of CRCs significantly promotes  
381 hLECs migration and tubulogenesis capacity, and hLECs proliferation in  
382 hypoxia. Interestingly, we have not found the evidence of aerobic  
383 glycolysis when hLECs proliferation is induced by CRCs in hypoxia. In  
384 contrast, we observe that triglycerides synthesis and lipolysis level in  
385 mitochondria of hLECs are significantly elevated. Our results suggest  
386 CRCs with SEMA3F KD induce lymphangiogenesis and activate the  
387 lipid metabolism in hypoxia. Within the tumor microenvironment, cancer  
388 cells consume large amounts of glucose by aerobic glycolysis resulting in  
389 hypoxia and hypoglycemia, LECs proliferation experience hypoglycemia  
390 and compete for nutrients, and facilitate their switch toward FA  
391 catabolism, and preserve their energy supply.

392 Why the energy supply in hLECs was not come from glycolysis but by  
393 lipid metabolism, at the hypoxia condition? However, the energy supply  
394 of tumor cell was via glycolysis in hypoxia. We have investigated the  
395 effects of insufficient SEMA 3F expression in 53 CRCs lines on

396 angiogenesis, epithelial-mesenchymal transition, energy metabolism  
397 and so on, and using large data to analyze it. It indicated that the  
398 glycolysis of CRCs own was increased, but the aerobic oxidation in  
399 mitochondrial was decreased, meanwhile, the fatty acid metabolism of  
400 CRCs was also significantly reduced in hypoxia. SEMA 3F expression  
401 deletion CRCs glycolysis was enhanced and consume a large amount of  
402 sugar, it lead to glucose (Glc) depletion within the TME. This metabolic  
403 stress in TME led metabolism of LECs switch toward to FAO to gain  
404 energy. The metabolic stress of TME also led the lymphatic capillary of  
405 tumor to collecting excess fluid and macromolecules from capillary beds  
406 almost have not sugar. Why lymphangiogenesis not apply glycolysis  
407 metabolism but switch toward to FAO and consume more oxygen? It  
408 indicate metabolism of lymphangiogenesis not only for energy supply but  
409 also for carbon source for nucleotide synthesis and amino acid synthesis  
410 (Schoors *et al*,2015; Zhang, *et al*,2017).This is why the energy supply of  
411 hLECs during tumor lymphangiogenesis in hypoxia is lipid metabolism.  
412 In recent years, the metabolic reprogramming about T cell in TME had  
413 been reported (Zhang, *et al*,2017; Pacella *et al*,2018). T cell enhanced  
414 PPAR- $\alpha$  signaling as a fuel switch to promote fatty acid uptakes and  
415 utilization. Consistently, in this study showed that CRCs with SEMA3F  
416 deficiency not only enhanced hLECs proliferation in hypoxia, but also  
417 reprogram LECs energy metabolism. Our data had shown

418 phosphorylation of PGC-1 $\alpha$  mediated by AMPK, PGC-1 $\alpha$  functions as a  
419 coactivator to induce PPARs, such as PPAR  $\alpha$  and PPAR  $\gamma$ , and  
420 stimulation of mitochondriogenesis and activation of mitochondrial FAO.  
421 It suggested the energy supply of tumor-associated lymphangiogenesis  
422 was lipid metabolism and OXPHOS through activation the PGC1-PPAR  
423 signaling pathway in hypoxia. In hypoxia TME, the hallmark of cancer  
424 cell metabolism is aerobic glycolysis (Warburg, 1956), hLECs facilitate  
425 their energy supply switch toward to FA catabolism. however, the more  
426 O<sub>2</sub> amount is consumed through FAO than aerobic glycolysis, it maybe  
427 supply other nutrients for LECs proliferation, such as FAO provided  
428 acetyl coenzyme A (acetylCoA) to help it deoxyribonucleotide (dNTP)  
429 synthesis, it is an anaplerotic substrate for proliferation of LECs (Schoors  
430 *et al*,2015).

431 The past research had shown that IL-6 could promote the lipid oxidation  
432 by raising PPAR in fatty livers (Hong *et al* ,2004; Awazawa *et al* ,2011).  
433 In this study, we found the CRCs with SEMA 3F KD could increase its  
434 IL-6 secretion, the IL-6 enhanced the PPAR expression of hLECs to  
435 drive its lipid metabolism in hypoxia. Wong et al reported that the  
436 transcription factor PROX1 upregulated CPT1A and VEGFR3  
437 expression, VEGFR3 ligand VEGF-C elevated FAO in LECs, LECs use  
438 fatty acid  $\beta$ -oxidation to proliferate to induce lymphangiogenesis (Wong  
439 *et al*,2017). Our data shown that, in the cancer hypoxia microenvironment,

440 CRCs with SEMA 3F KD could promote the secretion of IL-6, and driven  
441 mitochondria oxidation reaction in the hLECs by PGC1-PPAR signaling  
442 pathways, and not dependent VEGF-C/VEGFR3 signaling. Our findings  
443 revealed for the first time a novel role and the underlying mechanism of  
444 SEMA3F deficient CRCs involved the energy metabolism with hLECs in  
445 hypoxia, and induced tumor lymphangiogenesis of CRCs to promoting  
446 lymphatic metastasis.

447 In conclusion, in this study, our data firstly identified the hypoxia  
448 microenvironment promoted tumor lymphangiogenesis and the lipid  
449 metabolism was its major energy source when hLECs was proliferation  
450 during lymphangiogenesis, however, the glycometabolism of hLECs is  
451 suppressed. Our study we also first revealed CRCs secretion IL-6 as a  
452 driver, enhanced the expression of PPAR $\alpha$  and PGC-1 $\alpha$  in hLECs to  
453 mediate its the lipid metabolism in hypoxia. When the SEMA3F  
454 expression is deficiency in the tumor, the lymphangiogenesis and tumor  
455 cell IL-6 secretion and the lipid metabolism are further enhanced. It  
456 suggested SEMA3F inhibited tumor lymphangiogenesis not only via  
457 NRP2 signaling but also via inhibition LECs energy supply, such as  
458 inhibition it's lipid metabolism.

459

## 460 **Materials and methods**

461

462 **Isolation of endothelial cells from human tumors**

463 0.5–3g pieces of fresh CRC specimen were cut from the border of the  
464 malignancy to be used for the isolation of tumor lymphatic endothelial  
465 cells (LEC). The specimen was washed by transferring it using sterile  
466 forceps from a 50mL falcon with fresh ice-cold 1× HBSS to a new falcon  
467 with 1× HBSS four times consecutively. The specimen was removed  
468 from the falcon tube and was placed in a 10-cm cell culture dish to be  
469 minced into approximately 10-mm<sup>3</sup> pieces using a fresh, sterile scalpel.  
470 Minced tissue were put into a 15-mL falcon tube filled with 3mL  
471 EBM-2MV (Lonza, Cologne, Germany) supplemented with 0.5% FBS.  
472 Collagenase II (50mL enzyme per 0.1g tissue; 17,100U/g) was pipetted  
473 into each falcon tube, and EBM2-MV was added up to a total volume of  
474 5mL for each falcon. The falcon tubes were then put in the Dynal sample  
475 mixer (Invitrogen, Karlsruhe, Germany) at 37°C for 1h at 5% CO<sub>2</sub> with  
476 the lowest speed available. A 100mm cell strainer (BD Biosciences) was  
477 put on a 50mL falcon tube and the digested tissue was poured through the  
478 strainer. The filter was washed from the inside and outside using 3mL  
479 EBM-2MV each time, and was centrifuged with 500×g for 5min at 20°C  
480 to discard the supernatant. The cell pellet was resuspended in 5mL  
481 EBM-2-MV, and then was cultivated until 70–80% confluence in a T-25  
482 cell culture flask precoated with 1.5% gelatin for at least 2h. The isolated  
483 cells can be positively selected for VEGFR3 by MACS

484 (mouse-anti-human VEGFR3 antibody was purchased from Chemicon,  
485 and was ligated to the MACS obtained from Pierce) after the cultures  
486 reach 70–80% confluence. MACS selection was repeated until all  
487 nonendothelial cells were removed. Contamination with nonendothelial  
488 cells was analyzed by staining an aliquot of the cells for VEGFR3, and  
489 subsequent immunocytochemical or FACS analysis. The first confluent  
490 T-25 flask of pure LECs is designated as passage 0. One passage is  
491 defined by a split ratio of 1:4.

492

### 493 **Cell culture**

494 The human colon cancer cell lines LS147T were obtained from the  
495 American Type Culture Collection (ATCC, Manassas, VA), and  
496 maintained in L-15 (Invitrogen Corp.) supplemented with 10% fetal  
497 bovine serum at 37 °C under 5% CO<sub>2</sub>. Since both LS147T and HT-29 cell  
498 lines expressed SEMA3F, LS147T was less differentiated than HT-29 and  
499 was more prone to lymphatic metastasis. Therefore, we selected LS147T  
500 cell line as the research object (Supplementary Figure 1 A and B). Freshly  
501 isolated lymphatic endothelial cells were cultured in ATCC-formulated of  
502 F-12K Medium with 0.1 mg/mL heparin, 0.03–0.05 mg/mL ECGS,  
503 supplemented with fetal bovine serum at 37°C under 5% CO<sub>2</sub>. Cells were  
504 cultured either in normoxia, in a humidified, 5% CO<sub>2</sub>- and 20%  
505 O<sub>2</sub>-containing atmosphere or in hypoxic conditions, which were

506 generated in a humidified hypoxic incubator with 1% O<sub>2</sub>, 5% CO<sub>2</sub> and  
507 balanced N<sub>2</sub> content (94% N<sub>2</sub>, 5% CO<sub>2</sub>, 1% O<sub>2</sub>).

508

### 509 **Antibodies and reagents**

510 A Mouse monoclonal anti-B-cell lymphoma-2 (Bcl-2) (Catalog #05-729),  
511 a Rabbit polyclonal anti- SEMA3F (Catalog#AB5471P), a Rabbit  
512 polyclonal anti-HSL(Catalog # ABE204), rabbit polyclonal anti-GPAT1  
513 (ABS764) were a Chemicon International product (Temecula, USA);  
514 Monoclonal anti-AMPK and ACC Antibody Sampler Kit Antibodies for  
515 AMPK- $\alpha$ , (Catalog #: 9957), Glycolysis Antibody Sampler Kit (Catalog #:  
516 8337) including Hexokinase I (C35C4) Rabbit mAb #2024, Hexokinase  
517 II (C64G5) Rabbit mAb #2867, Pyruvate kinase (PKM1/2) (C103A3)  
518 Rabbit mAb #3190, Pyruvate Dehydrogenase (C54G1) Rabbit mAb  
519 #3205, Lactate dehydrogenase (LDHA) (C4B5) Rabbit mAb #3582,  
520 PKM2 (D78A4) XP® Rabbit mAb #4053, Phosphofructokinase (PFKP)  
521 (D4B2) Rabbit mAb #8164, rabbit anti-cleaved9(mAb#7237),  
522 anti-Caspase3(mAb#9665),HRP-conjugated secondary antibodies and a  
523 monoclonal anti-GAPDH (Catalog #2118) antibody for Western blotting  
524 were purchased from Cell Signalling Technology (Beverly, MA, USA). A  
525 rabbit polyclonal antibody against human Glut1 (H-43) (Catalog sc-7903),  
526 a mouse monoclonal antibody against chicken  $\beta$ -actin (C-4) (Catalog  
527 sc-47778, known to recognize mouse, human, rat, and chicken  $\beta$ -actin),



528 mouse anti-PPAR- $\alpha$  (mAb sc-130640) and mouse anti-PPAR- $\gamma$ (mAb  
529 sc-74517), rabbit polyclonal Anti-PGC1(sc-13067), $\square$ mouse anti-Cyclin  
530 D1 (mAb sc-70899 )and mouse anti-Cyclin D2(mAb sc-166288), PLC,  
531 mouse anti-DGAT (mAb sc-271934) were purchased from Santa Cruz  
532 Biotechnology, Inc. A mouse anti-human PARP (mAb#551025) was  
533 purchased from BDBio sciences (SanDiego,CA). A polyclonal rabbit  
534 anti-AGPAT (SAB2700797) and a monoacylglycerol lipase An MAGL  
535 rabbit polyclonal antibody (Cat. 011994) were purchased from  
536 Sigma-Aldrich. A rabbit anti-ATGL (mAb ab207799) was purchased from  
537 Abcam. A mouse monoclonal anti-PAPase (AM32058PU-N) was  
538 purchased from Acris. A rabbit polyclonal antibody Anti-CGI-58  
539 (#PAB12500, Abnova) was purchased from Abnova. A rabbit polyclonal  
540 antibody against human DAGL (diluted 1 : 2000, cat. DGLa-Rb-Af380)  
541 was purchased from Frontier Science. The GW9662, antagonist of  
542 PPAR- $\gamma$  was purchased from Cayman Chemicals (St Louis, MO, U.S.A.)  
543

#### 544 **Transfection plasmid information and establishment of stable cell** 545 **lines**

546 The SEMA3F expression vector pSectag-SEMA3F was kindly provided  
547 by Dr. David Ginty, and used as described previously. (Wu *et al*,2011)  
548 SEMA3F RNAi expression vectors and control plasmids were obtained  
549 and used as previously described (Wu *et al*,2011). Small interference

550 RNAs (siRNAs) against human IL-6 (#sc-39627), AMPK $\alpha$ 1(#sc-29673)  
551 and PGC1 $\alpha$ (#sc-38885) were obtained from Santa Cruz Biotechnology in  
552 deprotected and desalted form. All resultant constructs were verified by  
553 DNA sequencing, and then transfected into target cells with  
554 lipofectamine<sup>TM</sup> 2000 transfection reagent (Invitrogen, Carlsbad, CA,  
555 USA). Transfected cells were enriched by selection for 1 week with  
556 antibiotics selection.

557

### 558 **Protein extraction and western blotting**

559 Cell lysates were prepared with M-PER Mammalian Protein Extraction  
560 Reagent (PIERCE, PA, USA). A total of 30  $\mu$ g of lysate proteins were  
561 separated by SDS-PAGE after heat denaturation, transferred onto PVDF  
562 membranes, and incubated with 5% non-fat milk dissolved in PBS-Tween  
563 20 solution for 1 h, followed by incubation with a primary antibody  
564 overnight at 4 °C. After washing, the membranes were incubated with an  
565 appropriate HRP-conjugated secondary antibody, and then developed  
566 with enhanced chemiluminescence (ECL) detection reagents (Amersham  
567 Pharmacia Biosciences).

568

### 569 **Cytokine array/ELISA assay**

570 IL-6 concentrations in the cell supernatant were detected utilizing  
571 mouse IL -6 ELISA kit t (A015171517) purchased from GenScript

572 Biological Technology Co.Ltd. (New Jersey, United States,)and according  
573 to the kit instructions.

574

### 575 **Immunofluorescence microscopy studies**

576 Samples for immunofluorescence staining were fixed in ice-acetone for  
577 20 min, washed with PBS 3 times for 5 min each, and incubated for 30  
578 min at room temperature in a protein-blocking solution. The sections  
579 were incubated with the primary antibodies for 1 h at 37 °C and then at  
580 4 °C overnight. After washing, the sections were incubated at 37 °C for 1  
581 h with appropriate secondary antibodies, including FITC-conjugated goat  
582 anti-rabbit IgG (1:50, Santa Cruz), FITC-conjugated goat anti-mouse IgG  
583 (1:50, Santa Cruz), or TRITC-conjugated goat anti-mouse IgG (1:50,  
584 Beyotime, China). The sections were counterstained with Hoechst 33258  
585 to reveal cell nuclei.

586

### 587 **Transwell assay**

588 The migration ability of cells was assessed using Transwell chambers  
589 with polycarbonate membrane filters with 24-well inserts (6.5 mm  
590 diameter and 8 µm pore size) (Corning Life Sciences, Corning, NY, USA).  
591 The membrane filters were coated with 1.5 mg/ml Matrigel™ (BD  
592 Biosciences, Franklin Lakes, NJ, USA) before use. A total of 5000 cells  
593 in 150 µl of McCoy's 5A-Modified Medium with antibiotics but without

594 serum were seeded onto the upper chamber. The lower chamber was  
595 filled with 600  $\mu$ l McCoy's 5A-Modified Medium supplemented with  
596 antibiotics and 30% FBS. The medium in both chambers was changed  
597 once daily. After culture for 48 h, following removal of the non-migratory  
598 cells from the upper surface of the filter using a Q-tip, the migrated cells  
599 were fixed with cooled-acetone (4°C), and then stained with crystal violet  
600 solution (Invitrogen) and counted under ten different low-power (100 $\times$ )  
601 microscopic fields. The cell border was verified by switching to the  
602 high-power objective lens (400 $\times$ ) during counting.

603

#### 604 **Tubulogenesis assay**

605 LECs were cultured in ECM supplemented with 20% FBS for 12h, and  
606 then digested with trypsin /EDTA to prepare for cell suspension. The cell  
607 suspension( $1.0\times 10^6$ / mL) was seeded onto a 24-well plate coated with  
608 0.5mL of 4% matrigel, and was then co-cultured with or without CRC  
609 cells at 37 °C, 5% CO<sub>2</sub>. Cells were photographed every 2 days and the  
610 quantities of the branches of tube-like structures were counted (one  
611 branch as one tube).

612

#### 613 **Flow cytometry of apoptosis and cell cycle assay**

614 hLECs apoptosis was assessed by flow cytometry of Annexin V/PI  
615 (Sigma) staining. After harvesting, the cells were washed twice with PBS

616 and re-suspended in 200  $\mu$ l of 1x Annexin binding buffer. 5 $\mu$ l Annexin  
617 V-FITC and 5  $\mu$ l PI (propidium iodide) were then added to the cell  
618 suspension, and incubated at 37°C for 15 min. The stained cells were  
619 analyzed with FACS system (FACS Aria, BD Bioscience). hLECs cycle  
620 distribution was analyzed by flow cytometry using propidium iodide (PI)  
621 DNA staining (Visagie MH and Joubert AM, 2011). The cells were plated  
622 in a six-well plate at a density of  $2 \times 10^5$  cells per well, and the next day,  
623 the cells were treated with fixed concentrations of the fractions and  
624 cisplatin. After 24 h, the cells were disrupted and incubated with 40  $\mu$ g  
625  $\text{mL}^{-1}$  of PI (Cycle Test Plus BD solution, # 340242) for 10 min at 37 °C,  
626 5%  $\text{CO}_2$ , as instructed by the manufacturer. Analysis of the PI-labeled  
627 cells was performed by a flow cytometer and the cell cycle phases'  
628 distribution was determined as at least 20,000 cells.

629

### 630 **The cell triglyceride level assay**

631 Harvest the amount of hLECs necessary for each assay (initial  
632 recommend =  $1 \times 10^7$  cells). Wash cells with cold PBS two times.  
633 Resuspend and homogenize samples in 1 mL of 5% NP-40/ddH<sub>2</sub>O  
634 solution. Slowly heat the samples to 80 – 100°C in a water bath for 2 – 5  
635 minutes or until the NP-40 solution becomes cloudy, then cool down to  
636 room temperature. Repeat previous step to solubilize all triglycerides. Add  
637 2  $\mu$ L Lipase to Standard and Sample wells. Add 2  $\mu$ L Triglyceride Assay

638 Buffer (Abcam #ab65336; Abcam, Cambridge, UK) to Sample  
639 Background Control wells (do not add Lipase to these samples). Mix and  
640 incubate for 20 minutes at room temperature to convert triglyceride to  
641 glycerol and fatty acid. Add 50  $\mu$ L of Reaction Mix into each standard,  
642 sample, and background control wells. Mix and incubate at room  
643 temperature for 60 minutes protected from light. Measure output on a  
644 microplate reader at OD 570 nm for colorimetric assay or at Ex/Em =  
645 535/587 nm for fluorometric assay. The reaction is stable for at least 2  
646 hours.

647

#### 648 **The cell total cholesterol (TC )and free cholesterol Level Assay**

649 The TC and free cholesterol content of hLECs were measured  
650 colorimetrically using a Cholesterol assay kit according to the  
651 manufacturer's protocol (#ab65359; Abcam, Cambridge, UK). Harvest  
652 the amount of hLECs necessary for each assay (initial recommend = 1 x  
653  $10^7$  cells). Wash cells Cells were washed in ice-cold saline two  
654 times. Cholesterol and cholesteryl ester contents in cells were measured  
655 using cholesterol assay buffer after extracted with chloroform:  
656 Isopropanol: NP-40 (7:11:0.1). All samples were incubated with the  
657 cholesterol assay reaction buffer at 37°C for 60 min. The absorbance was  
658 measured at 570 nm.

659

## 660 **The cell phospholipidosis level assay**

661 the phospholipidosis assay was conducted using the hLECs. The  
662 LYSO-ID Red cytotoxicity kit (Enzo Life Sciences, Farmingdale, NY,  
663 USA) was used for the PLD assay. The LYSO-ID Red dye is a  
664 fluorescence reagent that accumulates in lysosomes. Harvest the amount  
665 of hLECs necessary for each assay (initial recommend =  $1 \times 10^7$  cells).  
666 Wash cells with cold PBS two times. The cells were stained with  
667 LYSO-ID Red dye according to the manufacturer's instructions. The  
668 fluorescence intensity (535 nm excitation, 670 nm emission) was  
669 measured using a microplate reader (Infinite F500, Tecan  
670 Japan, Kanagawa, Japan).

671

## 672 **Preparation of 3-Bromopyruvatic acid solution**

673 The 3-Bromopyruvatic Acid (3-BrPA) powder (Sigma) was dissolved in  
674 PBS. The pH value of this solution was adjusted to 7.0 with  $\text{NaHCO}_3$ .  
675 This neutralized 3-BrPA solution was then sterilized with a  $0.22 \mu\text{m}$  filter  
676 (Millipore), and used immediately.

677

## 678 **Lipase activity assay**

679 The lipase activity of cells was assessed using the fluorogenic ester  
680 substrate 4-methylumbelliferyl heptanoate (MUH) (Sigma). The stock  
681 solution of the substrate was prepared by dissolving 1.8 mg of 4-MUH in

682 1.5 ml methoxyethanol, followed by dilution to 25 ml with distilled water  
683 for a final concentration of 1 mM ester. The cells were washed with  
684 Tris-buffered saline for 3 times, and then harvested in an ice-cold  
685 homogenization buffer [50 mM Tris-HCl (pH 7.4), 250 mM sucrose, 1  
686 mM EDTA]. The enzymatic reaction was initiated by the injection of 60  
687  $\mu$ l of 2.5  $\mu$ M MUH in a solution containing 20mM Tris-HCl, pH 8.0 and  
688 1 mM EDTA to 40  $\mu$ l (100  $\mu$ g) of the cell homogenate in a 96-well plate  
689 (total volume 100  $\mu$ l). The plate was agitated at room temperature and  
690 fluorescence was read with a Fluoroskan Ascent FL Type 374 (Thermo  
691 Labsystems) in a kinetic fashion up to 10 min (excitation/emission  
692 wavelengths of 355/460 nm). Data were analyzed using GraphPad Prism  
693 5 software.

694

### 695 **Deoxyglucose uptake and lactate assays**

696 For glucose uptake, the cells in 6-well plates were incubated with  
697 Krebs–Ringer phosphate buffer supplemented with 1% BSA at 37°C for  
698 30 min. The cells were washed with PBS, and glucose uptake was  
699 initiated by adding 2 ml serum-free and glucose-free DMEM containing  
700 2-[1,2-<sup>3</sup>H(N)]-2-deoxy-D-glucose (DG) (NET328, specificity 8 Ci/mmol)  
701 at 1 $\mu$ Ci/ml and 10 mM unlabeled-2-DG (Sigma, Catalog #: D-3179) to  
702 each sample in the absence and presence of 20  $\mu$ M cytochalasin B (Sigma  
703 Catalog #: C6762), a potent inhibitor of glucose transport. After 5 min



704 incubation, the glucose uptake was terminated by washing the cells  
705 rapidly with ice-cold Krebs–Ringer phosphate buffer containing 0.2 mM  
706 phloretin (Sigma, Catalog #: P7912). The cells were then solubilized in  
707 500  $\mu$ l of 0.1% SDS, of which 5  $\mu$ l was used for the determination of  
708 protein concentration, and the rest for liquid scintillation counting after  
709 adding 5 ml of Bio-Safe II Cocktail (Fisher, Catalog #: M1-11195). For  
710 insulin stimulated-glucose uptake assay, prior to addition of DG, the cells  
711 were washed with the insulin-free Stimulation Medium (serum-free and  
712 glucose-free DMEM with antibiotics, L-glutamine and 20 mM HEPES),  
713 and then incubated with 1 ml of Stimulation Medium supplemented with  
714 0.5 nM human insulin (Sigma) for 5 min. Other steps were identical to  
715 those described above for non-stimulated glucose uptake. All experiments  
716 were done in triplicate.

717

### 718 **Fatty acid oxidation assay**

719 The incubation medium containing 0.05  $\mu$ Ci/ml [ $^{14}$ C]palmitic acid  
720 (ARC0172A, specificity 58 mCi/mmol), 0.8 mM unlabeled-oleic acid,  
721 and 170  $\mu$ M fatty acid-free BSA in PBS was prepared before use. The  
722 cells were incubated with the incubation medium at 37°C in a 25-cm<sup>2</sup>  
723 Corning cell culture plastic flask whose mouth was tightly covered with a  
724 square of lab wipe tissue (Kimwipes, Fisher#: 06-666-A) that was  
725 pre-rinsed in 1N NaOH for capture of produced CO<sub>2</sub>. One hour after

726 incubation, the covered wipe tissue was removed for scintillation  
727 counting. The cells were then lysed with 500  $\mu$ l of 0.1% SDS, 5  $\mu$ l of  
728 which was used for protein quantification. Fatty acid oxidation was  
729 calculated as radioactivity on the wipe tissue that was normalized to the  
730 total amount of cell proteins in the flask.

731

### 732 **Seahorse assays for mitochondria functions**

733 Cell mitochondrial oxygen consumption rates (OCRs) were assayed in  
734 96-well plates by using a XF Cell Mito Stress Test Kit (Cat. #:  
735 101706100, Seahorse Bioscience, U.S.) on the XFe96 Extracellular Flux  
736 Analyzer (Seahorse Bioscience, U.S.) according the Manufacturer's  
737 instruction. Basal cellular OCRs were recorded in the absence of any  
738 treatment. To record OCRs under metabolic inhibitors or uncouplers, cells  
739 were first treated with 2  $\mu$ g/ml oligomycin to inhibit ATPase. To achieve  
740 maximal OCRs, the respiratory chain was uncoupled from oxidative  
741 phosphorylation by stepwise titration with 1  $\mu$ g/ml carbonyl cyanide  
742 p-(trifluoromethoxy) phenylhydrazone (FCCP). To completely inhibit the  
743 mitochondrial respiratory chain, cells were treated with rotenone (Mito  
744 Inhibitor B, a Complex I inhibitor) at 1  $\mu$ g/ml and antimycin A (Mito  
745 Inhibitor A, a Complex III inhibitor) at 1  $\mu$ g/ml. OCRs were expressed as  
746 pmoles/min.

747

748 **Staining of mitochondria**

749 Cells were incubated at 37°C and 5% CO<sub>2</sub> with MitoTracker-Red FM  
750 (100 nM) (Invitrogen) for 15 min to stain mitochondria and Hoechst  
751 33258 (2.5 mg/mL) for 15 min to stain nuclei and washed with PBS in  
752 between. To stimulate the biogenesis of mitochondria, cells were  
753 pretreated with interleukin 4 (IL-4) (Cat. # Z02925-10, GenScript) at a  
754 concentration of 5 ng/ml for 24h. Images were taken under an  
755 immunofluorescence microscope.

756

757 **Data collection**

758 CRC cell expression data from Gene Expression Omnibus (GEO)  
759 GSE36133, the submission of CCLE(Cancer Cell Line Encyclopedia)  
760 by broad institute. All the CRC cell samples were divided into 2 groups  
761 according the median of SEMA3F expression.

762

763 **Gene set enrichment analysis**

764 Gene set enrichment analysis(Subramanian *et al* ,2005), was performed  
765 using java GSEA Desktop Application (Broad Institute) with the hallmark  
766 gene sets (n=50) and KEGG gene sets (n=186) implemented in Molecular  
767 Signatures Database (MSigDB 6.0), expression data and phenotype data  
768 were formatted following the user guide, samples were permuted with  
769 SEMA3F expression level 1000 times.

770

## 771 **Statistical analysis**

772 Data are expressed as Mean  $\pm$  SEM (Standard Error of the Mean). The  
773 pathological scoring data of human specimens were analyzed by 2  
774 biostatisticians in the Department of Statistics, The Third Military  
775 Medical University, China. The statistical analysis was performed by  
776 one-way ANOVA (when  $>3$  groups) or Students t-test (between two  
777 groups) using Graph Pad Prism software. The differences between the  
778 values were considered statistically significant when  $P < 0.05$ .

779

## 780 **Acknowledgements**

781 We would like to thank the referees and editor, who gave us outstanding  
782 advice and helped us build the concepts presented in this work. We would  
783 like to thank the referees and editor, who gave us outstanding advice and  
784 helped us build the concepts presented in this work. We thank Dr  
785 Juanjuan Ou, Department of Oncology, Southwest Hospital, Army  
786 Medical University, Chongqing, China, for her excellent technical  
787 assistance and help in editing this manuscript. The authors thank Dr  
788 Feng Wu, Institute of Pathology of Army Medical University, for help in  
789 editing this manuscript. We thank the Centre for Advanced Imaging of  
790 Army Medical University, for assistance in confocal laser scanning  
791 microscopy imaging. Qi Zhou was supported by the Natural Science  
792 Foundation of Chongqing Municipal Science and Technology  
793 Commission grant cstc2019jcyj-msxmX0711; Miaomiao Tao is funded  
794 by Chongqing Health and Family Planning Committee/ Chongqing  
795 Municipal Science and Technology Commission grant ZY201802003.

796

## 797 **Author contributions**

798 Min Chen and Qi Zhou designed the study. Qi Zhou, xiaoyuan Fu and  
799 Miaomiao Tao made the figures, and wrote the article. xiaoyuan Fu and  
800 Miaomiao Tao performed all of the gene transfection, Western blotting, as  
801 well as data analysis. Hongbo Ma and Cancan Wang generated hLECs  
802 and cell culture and gene KO. Yanyan Li, Xiaoqiao Hu and XiuRong Qin  
803 performed the glycolysis metabolism assay. Renming Lv and Gengdou  
804 Zhou performed the fatty acid oxidation assay. Jun Wang and Meiyu  
805 Zhou performed the assays for mitochondria functions. Guofa Xu  
806 performed the big data analysis and provided supervision, designed the  
807 study, and wrote the article. Zexin Wang provided valuable  
808 recommendations, contributing to the study design and reagents.

809

## 810 **Conflict of interest**

811 The authors declare that they have no conflict of interest.

812

## 813 **Reference**

814 Awazawa M, Ueki K, Inabe K, Yamauchi T, Kubota N, Kaneko K, Kobayashi  
815 M, Iwane A, Sasako T, Okazaki Y, et al (2011) Adiponectin enhances insulin  
816 sensitivity by increasing hepatic IRS-2 expression via a macrophage-derived  
817 IL-6-dependent pathway. *Cell Metab* 13:401-412.

818 Bielenberg DR, Hida Y, Shimizu A, Kaipainen A, Kreuter M, Kim CC, Klagsbrun M  
819 (2004) SEMAphorin 3F, a chemorepellent for endothelial cells, induces a poorly  
820 vascularized, encapsulated, nonmetastatic tumor phenotype. *J Clin*  
821 *Invest.* ;114:1260– 1271.

822 Birsoy K, Possemato R, Lorbeer FK, Bayraktar EC, Thiru P, Yucel B, Wang T, Chen  
823 WW, Clish CB, Sabatini DM, et al (2014) Metabolic determinants of cancer cell  
824 sensitivity to glucose limitation and biguanides. *Nature* 508: 108-1012.

825 Cao J, Li JL, Li D, Tobin JF, Gimeno RE (2006) Molecular identification of  
826 microsomal acyl-CoA:glycerol-3-phosphate acyltransferase, a key enzyme in de  
827 novo triacylglycerol synthesis. *Proc Natl Acad Sci U S A* 103:19695-19700

828 Chen H, He Z, Bagri A, Tessier-Lavigne M (1998) Semaphorin-neuropilin  
829 interactions underlying sympathetic axon responses to class III semaphorins.  
830 *Neuron* 21:1283-1290.

831 Coate TM, Spita NA, Zhang KD, Isgrig KT, Kelley MW.(2015) Neuropilin-2/  
832 Semaphorin-3F-mediated repulsion promotes inner hair cell innervation by spiral  
833 ganglion neurons. *Elife* 4.

834 DeWaal D, Nogueira V, Terry AR, Patra KC, Jeon SM, Guzman G, Au J, Long  
835 CP, Antoniewicz MR, Hay N (2018) Author Correction: Hexokinase-2 depletion  
836 inhibits glycolysis and induces oxidative phosphorylation in hepatocellular  
837 carcinoma and sensitizes to metformin. *Nat Commun* 9:2539.

838 Doçi CL, Mikelis CM, Lionakis MS, Molinolo AA, Gutkind JS. Genetic identification  
839 of SEMA3F as an anti-lymphangiogenic metastasis suppressor gene in head and  
840 neck squamous carcinoma. *Cancer Res.* 2015 Jul 15; 75(14): 2937–2948.

841 Faubert B, Li KY, Cai L, Hensley CT, Kim J, Zacharias LG, Yang C, Do  
842 QN, Doucette S, Burguete D, et al (2017) Lactate Metabolism in Human Lung  
843 Tumors. *Cell* 171:358-371.e9

844 Fu AKY, Ip NY (2017) Homeostatic Scaling of AMPA Receptors by  
845 Semaphorin. *Neuron* 96:955-958.

846 Hanahan D, Weinberg RA (2011) Hallmarks of cancer: the next generation. *Cell*  
847 144:646–674.

848 He Z, Tessier-Lavigne M (1997) Neuropilin is a receptor for the axonal  
849 chemorepellent Semaphorin III. *Cell* 90:739-751.

850 Hong F, Radaeva S, Pan HN, Tian Z, Veech R, Gao B (2004) Interleukin 6 alleviates  
851 hepatic steatosis and ischemia/reperfusion injury in mice with fatty liver disease.  
852 *Hepatology* 40(4):933-41.

853 Inokuchi K, Imamura F, Takeuchi H, Kim R, Okuno H, Nishizumi H, Bito H, Kikusui  
854 T, Sakano H (2017) Nrp2 is sufficient to instruct circuit formation of  
855 mitral-cells to mediate odour-induced attractivesocial responses. *Nat Commun* 8:  
856 15977.

- 857 Julien SG, Kim SY, Brunmeir R, Sinnakannu JR, Ge X, Li H, Ma W, Yaligar J, Kn  
858 BP, Velan SS, et al (2017) Narciclasine attenuates diet-induced obesity by  
859 promoting oxidative metabolism in skeletal muscle. *PLoS Biol* 15:e1002597.
- 860 Klagsbrun M, Shimizu A (2010) Semaphorin 3E, an exception to the rule. *J Clin*  
861 *Invest* 120:2658-2660.
- 862 Liu F, Ma F, Wang Y, Hao L, Zeng H, Jia C, Wang Y, Liu P, Ong IM, Li B, et al (2017)  
863 PKM2 methylation by CARM1 activates aerobic glycolysis to promote  
864 tumorigenesis. *Nat Cell Biol* 19:1358-1370.
- 865 Lumb R, Tata M, Xu X, Joyce A, Marchant C, Harvey N, Ruhrberg C, Schwarz Q  
866 (2018) Neuropilins guide preganglionic sympathetic axons and chromaffin cell  
867 precursors to establish the adrenal medulla. *Development* 145: dev162552.
- 868 Ma Q, Dieterich LC, Ikenberg K, Bachmann SB, Mangana J, Proulx ST, Amann  
869 VC, Levesque MP, Dummer R, Baluk P, McDonald DM, Detmar M (2018)  
870 Unexpected contribution of lymphatic vessels to promotion of distant metastatic  
871 tumor spread. *Sci Adv* 4:eaat4758.
- 872 Morrison SF, Madden CJ, Tupone D (2014) Central neural regulation of brown adipose  
873 tissue thermogenesis and energy expenditure. *Cell Metab* 19: 741–756.
- 874 Nagarajan A, Dogra SK, Sun L, Gandotra N, Ho T, Cai G, Cline G, Kumar P, Cowles  
875 RA, Wajapeyee N (2017) Paraoxonase 2 Facilitates Pancreatic Cancer Growth and  
876 Metastasis by Stimulating GLUT1-Mediated Glucose Transport. *Mol Cell*  
877 67(4):685-701.e6.
- 878 Nakamura Y, Yanagawa Y, Morrison SF, Nakamura K (2017) Medullary Reticular  
879 Neurons Mediate Neuropeptide Y-Induced Metabolic Inhibition and Mastication. *C*  
880 *ell Metab* 25: 322–334.
- 881 Ohba Y, Sakuragi T, Kage-Nakadai E, Tomioka NH, Kono N, Imae R, Inoue A, Aoki  
882 J, Ishihara N, Inoue T (2013) Mitochondria-type GPAT is required for  
883 mitochondrial fusion. *EMBO J*. May 02;32(9):1265-1279.
- 884 Ou JJ, Wei X, Peng Y, Zha L, Zhou RB, Shi H, Zhou Q, Liang HJ (2015)  
885 Neuropilin-2 mediates lymphangiogenesis of colorectal carcinoma via a  
886 VEGFC/VEGFR3 independent signaling. *Cancer Lett* 358:200-209.

- 887 Owen BM, Ding X, Morgan DA, Coate KC, Bookout AL, Rahmouni K, Kliewer  
888 SA, Mangelsdorf DJ.(2014) FGF21 acts centrally to induce sympathetic nerve  
889 activity, energy expenditure, and weight loss. *Cell Metab* 20:670-677.
- 890 Pacella I, Procaccini C, Focaccetti C, Miacci S, Timperi E, Faicchia D, Severa  
891 M, Rizzo F, Coccia EM, Bonacina F, et al (2018) Fatty acid metabolism  
892 complements glycolysis in the selective regulatory T cell expansion during tumor  
893 growth. *Proc Natl Acad Sci USA* 115:E6546-E6555.
- 894 Padera TP, Meijer EF, Munn LL (2016) The Lymphatic System in Disease Processes  
895 and Cancer Progression. *Annu Rev Biomed Eng* 18:125-58.
- 896 Riera CE, Tsaousidou E, Halloran J, et al (2017) The Sense of Smell Impacts  
897 Metabolic Health and Obesity. *Cell Metab* 26:198-211.e5.
- 898 Royston D, Jackson DG (2009) Mechanisms of lymphatic metastasis in human  
899 colorectal adenocarcinoma. *J Pathol* 217:608-619.
- 900 Sakurai A, Doçi CL, Gutkind JS (2012) Semaphorin signaling in angiogenesis,  
901 lymphangiogenesis and cancer. *Cell Res* 22:23-32.
- 902 Schoors S, Bruning U, Missiaen R, Queiroz KC, Borgers G, Elia I, Zecchin A,  
903 Cantelmo AR, Christen S, Goveia J, et al (2015) Fatty acid carbon is essential for  
904 dNTP synthesis in endothelial cells. *Nature* 520: 192–197.
- 905 Subramanian A, Tamayo P, Mootha VK, Mukherjee S, Ebert BL, Gillette  
906 MA, Paulovich A, Pomeroy SL, Golub TR, Lander ES, Mesirov JP .et al (2005)  
907 Gene set enrichment analysis:a knowledge-based approach for interpreting genome  
908 -wide expression profiles. *Proc Natl Acad Sci U S A*.102:15545-50.
- 909 Sukonina V, Ma H, Zhang W, Bartesaghi S, Subhash S, Heglind M, Foyn H, Betz  
910 MJ, Nilsson D, Lidell ME, et al (2019) FOXK1 and FOXK2 regulate aerobic  
911 glycolysis. *Nature* 566:279-283.
- 912 Sulay Tovar, Lars Paeger, Simon Hess, et al (2013) KATP-Channel-Dependent  
913 Regulation of Catecholaminergic Neurons Controls BAT Sympathetic Nerve  
914 Activity and Energy Homeostasis. *Cell Metab*. Sep 3; 18(3): 445–455.
- 915 Takeuchi H, Inokuchi K, Aoki M, Suto F, Tsuboi A, Matsuda I, Suzuki M, Aiba  
916 A, Serizawa S, Yoshihara Y, et al (2010) Sequential arrival and graded secretion  
917 of SEMA3F by olfactory neuron axons specify maptopography at the bulb. *Cell*  
918 141: 1056-1067.
- 919 Tang M, Gao G, Rueda CB, Yu H, Thibodeaux DN, Awano T, Engelstad  
920 KM, Sanchez-Quintero MJ, Yang H, Li F (2017) Brain microvasculature defects



921 and Glut1 deficiency syndrome averted by early repletion of the glucose  
922 transporter-1 protein. *Nat Commun* 8:14152.

923 Tessier-Lavigne M, Goodman CS (1996) The Molecular Biology of Axon  
924 Guidance. *Science* 274: 1123-1133

925 Tran TS, Rubio ME, Clem RL, Johnson D, Case L, Tessier-Lavigne M, Haganir RL,  
926 Ginty DD, Kolodkin AL (2009). Secreted semaphorins control spine distribution  
927 and morphogenesis in the postnatal CNS. *Nature* 462: 1065–1069.

928 van der Klaauw AA, Croizier S, Mendes de Oliveira E, Stadler LKJ, Park S, Kong  
929 Y, Banton MC, Tandon P, Hendricks AE, Keogh JM, et al (2019) Human  
930 semaphorin 3 Variants Link Melanocortin Circuit Development and Energy  
931 Balance. *Cell* 176:729- 742.e18.

932 Vellinga TT, Kranenburg O, Frenkel N, Ubink I, Marvin D, Govaert K, van Schelven  
933 S, Hagendoorn J, Borel Rinkes IH (2017) Lymphangiogenic Gene Expression Is  
934 Associated With Lymph Node Recurrence and Poor Prognosis After Partial  
935 Hepatectomy for Colorectal Liver Metastasis. *Ann Surg* 266:765-771.

936 Veronese N, Nottegar A, Pea A, Solmi M, Stubbs B, Capelli P, Sergi G, Manzato  
937 E, Fassan M, Wood LD et al (2016) Prognostic impact and implications of  
938 extracapsular lymph node involvement in colorectal cancer: a systematic review  
939 with meta-analysis. *Ann Oncol.* Jan;27(1):42-48.

940 Visagie MH, Joubert AM (2011) In vitro effects of  
941 2-methoxyestradiol-bis-sulphamate on reactive oxygen species and possible  
942 apoptosis induction in a breast adenocarcinoma cell line. *Cancer Cell Int* 11, 43.

943 Wang Q, Chiu SL, Koropouli E, Hong I, Mitchell S, Easwaran TP, Hamilton NR,  
944 Gustina AS, Zhu Q, Ginty DD, Haganir RL, Kolodkin AL (2017) Neuropilin-2/  
945 PlexinA3 Receptors Associate with GluA1 and Mediate Sema3F-Dependent  
946 Homeostatic Scaling in Cortical Neurons. *Neuron* 96:1084-1098.e7

947 Weinberg SE, Sena LA, Chandel NS (2015) Mitochondria in the regulation of  
948 innate and adaptive immunity. *Immunity* 42:406-417.

949 Wong BW, Wang X, Zecchin A, Thienpont B, Cornelissen I, Kalucka  
950 J, García-Caballero M, Missiaen R, Huang H, Brüning U, et al (2017) The role of  
951 fatty acid  $\beta$ -oxidation in lymphangiogenesis. *Nature* 542:49–54.

952 Wu F, Zhou Q, Yang J, Duan GJ, Ou JJ, Zhang R, Pan F, Peng QP, Tan H, Ping YF,  
953 et al (2011) Endogenous axon guiding chemorepulsant semaphorin-3F inhibits the  
954 growth and metastasis of colorectal carcinoma. *Clin Cancer Res* 17:2702–2711.

955 Zhang Y, Kurupati R, Liu L, Zhou XY, Zhang G, Hudaihed A, Filisio F, Giles-Davis  
956 W, Xu X, Karakousis GC, et al (2017) Enhancing CD8+ T Cell Fatty Acid  
957 Catabolism within a Metabolically Challenging Tumor Microenvironment  
958 Increases the Efficacy of Melanoma Immunotherapy. *Cancer Cell* 32:377–391.

959

960

961

962

963

964

965

966

967

968

969

970

971

972

973

974

975

976

977

978

979

980

981

982

983

984

985

986 **Figure 1. SEMA3F deficient further contribute to CRCs cell-induced**  
987 **migration and tubulogenesis of hLECs at the hypoxia condition.**

988 A, SEMA3F knockdown in CRCs enhance tubulogenesis of hLECs both  
989 normoxia or hypoxic, which is more pronounced at hypoxia.

990 B, Hypoxia culture in vitro, SEMA3F knockdown of CRCs increased the  
991 number and length of tubules of hLECs( \*  $p<0.05$ , \* \*  $p<0.01$ ).

992 C, SEMA3F knockdown in CRCs promote hLECs migration using  
993 transwell assay and proliferation at hypoxia than those in in normoxia.

994 D, The CRCs knocked down by SEMA3F during hypoxia significantly  
995 reduced the apoptosis of hLECs using flow cytometry of Annexin V/PI  
996 (Sigma) staining compared with the normoxic group( \*  $p<0.05$ ).

997 E, Western blot analysis confirmed that SEMA3F knockdown in CRCs  
998 resulted in decreased expression of hLECs pro-apoptotic and  
999 anti-apoptosis-related gene proteins, and the hypoxic culture group was  
1000 more markedly reduced than the normoxic culture group.

1001 F, Compared with the normoxic group, flow cytometry detection of  
1002 SEMA3F knockdown in CRCs significantly increased the proportion of  
1003 G1 phase of hypoxic cultured hLECs and promoted the proliferation of  
1004 hLECs.

1005 G, Western blotting determined that SEMA3F knockdown in CRCs could  
1006 increase the expression of cyclinD1 in hLECs cultured in hypoxia.

1007

1008 **Figure 2. SEMA 3F-deficient CRCs under hypoxic conditions**  
1009 **promote mitochondrial lipid oxidation in hLECs.**

1010 A, The triglyceride levels of hLECs co-cultured with SEMA 3F-deficient  
1011 CRCs under hypoxic conditions were elevated, but free cholesterol, total

1012 cholesterol and phospholipid levels did not differ between the normoxic  
1013 and hypoxic culture groups( \*  $p<0.05$ ).

1014 B, Western blot analysis of the protein levels of GPAT、AGPAT、PLC、  
1015 PAPase、DGAT、DAGL、MGL、HSL、ATGL、CGI-58 in hLECs  
1016 co-cultured with SEMA 3F-deficient CRCs and control group at  
1017 hypoxia condition.

1018 C, Immunofluorescence showed the activity of mitochondria in hLECs  
1019 which co-culture with CRCs in SEMA3F knockdown and control group  
1020 at hypoxia condition.

1021 D, The mitochondrial respiratory chain complex Oligomycin、Fccp and  
1022 Antimycin A & Rotenone level in hLECs which co-culture with CRCs in  
1023 SEMA3F KD groups and control group at hypoxia condition( \*  $p<0.05$ ).

1024 E, The concentration of CO<sub>2</sub> productions of hLECs which co-culture  
1025 with CRCs in SEMA3F KD groups and control group at hypoxia  
1026 condition( \* \*  $p<0.01$ ).

1027 F, the mitochondrial fluorescence value of hLECs which co-culture with  
1028 CRCs in SEMA3F KD groups and control group at hypoxia  
1029 condition( $p<0.01$ ).

1030

1031 **Figure3.SEMA 3F expression deletion CRCs inhibited**  
1032 **glycometabolism of hLECs at the hypoxia condition.**

1033 A, Western blots analysis the expression levels of GLUT1 of hLECs  
1034 which co-culture with CRCs in SEMA3F KD groups and control groups  
1035 at hypoxia condition.

1036 B, The basal glucose uptake and insulin-stimulated glucose uptake level  
1037 of hLECs which co-culture with CRCs in SEMA3F KD groups and  
1038 control groups at hypoxia condition ( \*  $p<0.05$ , \* \*  $p<0.01$ ).

1039 C, The L- lactate concentration of hLECs lysate which co-culture with  
1040 CRCs in SEMA3F KD groups and control groups at hypoxia  
1041 condition( \*  $p<0.05$ ).

1042 D, The L- lactate concentration of hLECs culture medium which  
1043 co-culture with CRCs in SEMA3F KD groups and control groups at  
1044 hypoxia condition( \*  $p<0.05$ , \* \*  $p<0.01$ ).

1045 E, Western blots analysis the exprssion levels of HK I、 HK II、 LDHA、  
1046 PKM2 and PDH in hLECs which co-culture with CRCs in SEMA3F KD  
1047 groups and control groups at hypoxia condition.

1048 F, The apoptosis rate of hLECs which co-culture with CRCs in SEMA3F  
1049 KD groups and control groups at hypoxia condition after  
1050 3-bromopyruvate treatment( \* \*  $p<0.01$ ).

1051 **Figure4. CRCs with SEMA 3F KD promoted the activation of lipid**  
1052 **oxidation signaling pathway PGC1-PPAR in hLECs at the hypoxia**  
1053 **condition.**

1054 A, Lysates from hLECs which co-culture with CRCs in SEMA3F KD  
1055 groups and control groups were immunoblotted for  
1056 AMPK,P-AMPK,PGC1 $\alpha$ ,PPAR, PPAR $\gamma$  at hypoxia condition.

1057 B, The PPAR activity of hLECs which co-culture with CRCs in SEMA3F  
1058 KD groups and control groups at hypoxia condition( \*  $p<0.05$ ).

1059 C, Comparison of the PPAR activity of LECs without and with AMPK $\alpha$ 1  
1060 or PGC1 $\alpha$  KD, which co-culture with CRCs in SEMA3F KD groups and  
1061 control groups at hypoxia condition( \*  $p<0.05$ ).

1062 D, Comparison of the total tubes number sprout from hLECs without and  
1063 with AMPK $\alpha$ 1KD, which co-culture with CRCs in SEMA3F KD groups  
1064 and control groups in hypoxia ( \*  $p<0.05$ ).

1065 E, Lysates from hLECs with and without PPAR  $\gamma$  antagonist which  
1066 co-culture with CRCs in SEMA3F KD groups and control groups in  
1067 hypoxia were immunoblotted for P-AMPK $\alpha$ , PGC1 $\alpha$ .

1068

1069 **Figure5. SEMA3F-deficient CRCs under hypoxic conditions promote**  
1070 **hLECs PGC1-PPAR lipid oxidation signaling pathway activation by**  
1071 **secreting interleukin-6**

1072 A, The IL-6 mRNA level of SEMA3F KD-CRCs groups and control  
1073 groups at the hypoxia.

1074 B, The supernatant IL-6 level in CRCs with SEMA3F KD groups and  
1075 control groups at the hypoxia( \* \* p<0.01).

1076 C, Relative PPAR activity of hLECs co-cultured with SEMA3F KD  
1077 -CRCs group and control group when silencing IL-6 expression of CRCs  
1078 at the hypoxia.

1079 D, Number of tubes sprout from hLECs which co-culture with CRCs in  
1080 SEMA3F KD groups and control groups at the hypoxia when silenced the  
1081 IL-6 expression of CRCs.

1082 E, Changes of P-AMPK $\alpha$  and PGC1 $\alpha$  protein level with western blots  
1083 analysis in hLECs co-culture with SEMA 3F expression deletion CRCs  
1084 groups and control groups after adding IL-6 antibody at the hypoxia.

1085

1086 **Figure 6.The results of big data analysis showed that the SEMA 3F**  
1087 **knockout CRCs increased the hypoxia signal and increased their own**  
1088 **glycolysis activity.**

1089 A .SEMA 3F expression deficiency of 53 CRCs lines enhanced its  
1090 hypoxia signal, while induce CRCs epithelial mesenchymal transition,  
1091 and promote angiogenesis.

1092 B, SEMA 3F expression deficiency of 53 CRCs lines enhanced its

1093 glycolysis, but reduced its fatty acid metabolism and TCA cycle.

1094 C, The enrichment geneset in 53 CRCs lines when SEMA3F expression  
1095 was deficient.

1096

1097 **Supplementary Figure1**

1098 A, HT-29 CRC cell line with SEMA3F expression and SEMA3F knocked  
1099 down.

1100 B, LS174T CRC cell line with SEMA3F expression and SEMA3F  
1101 knocked down.

**Figure 1**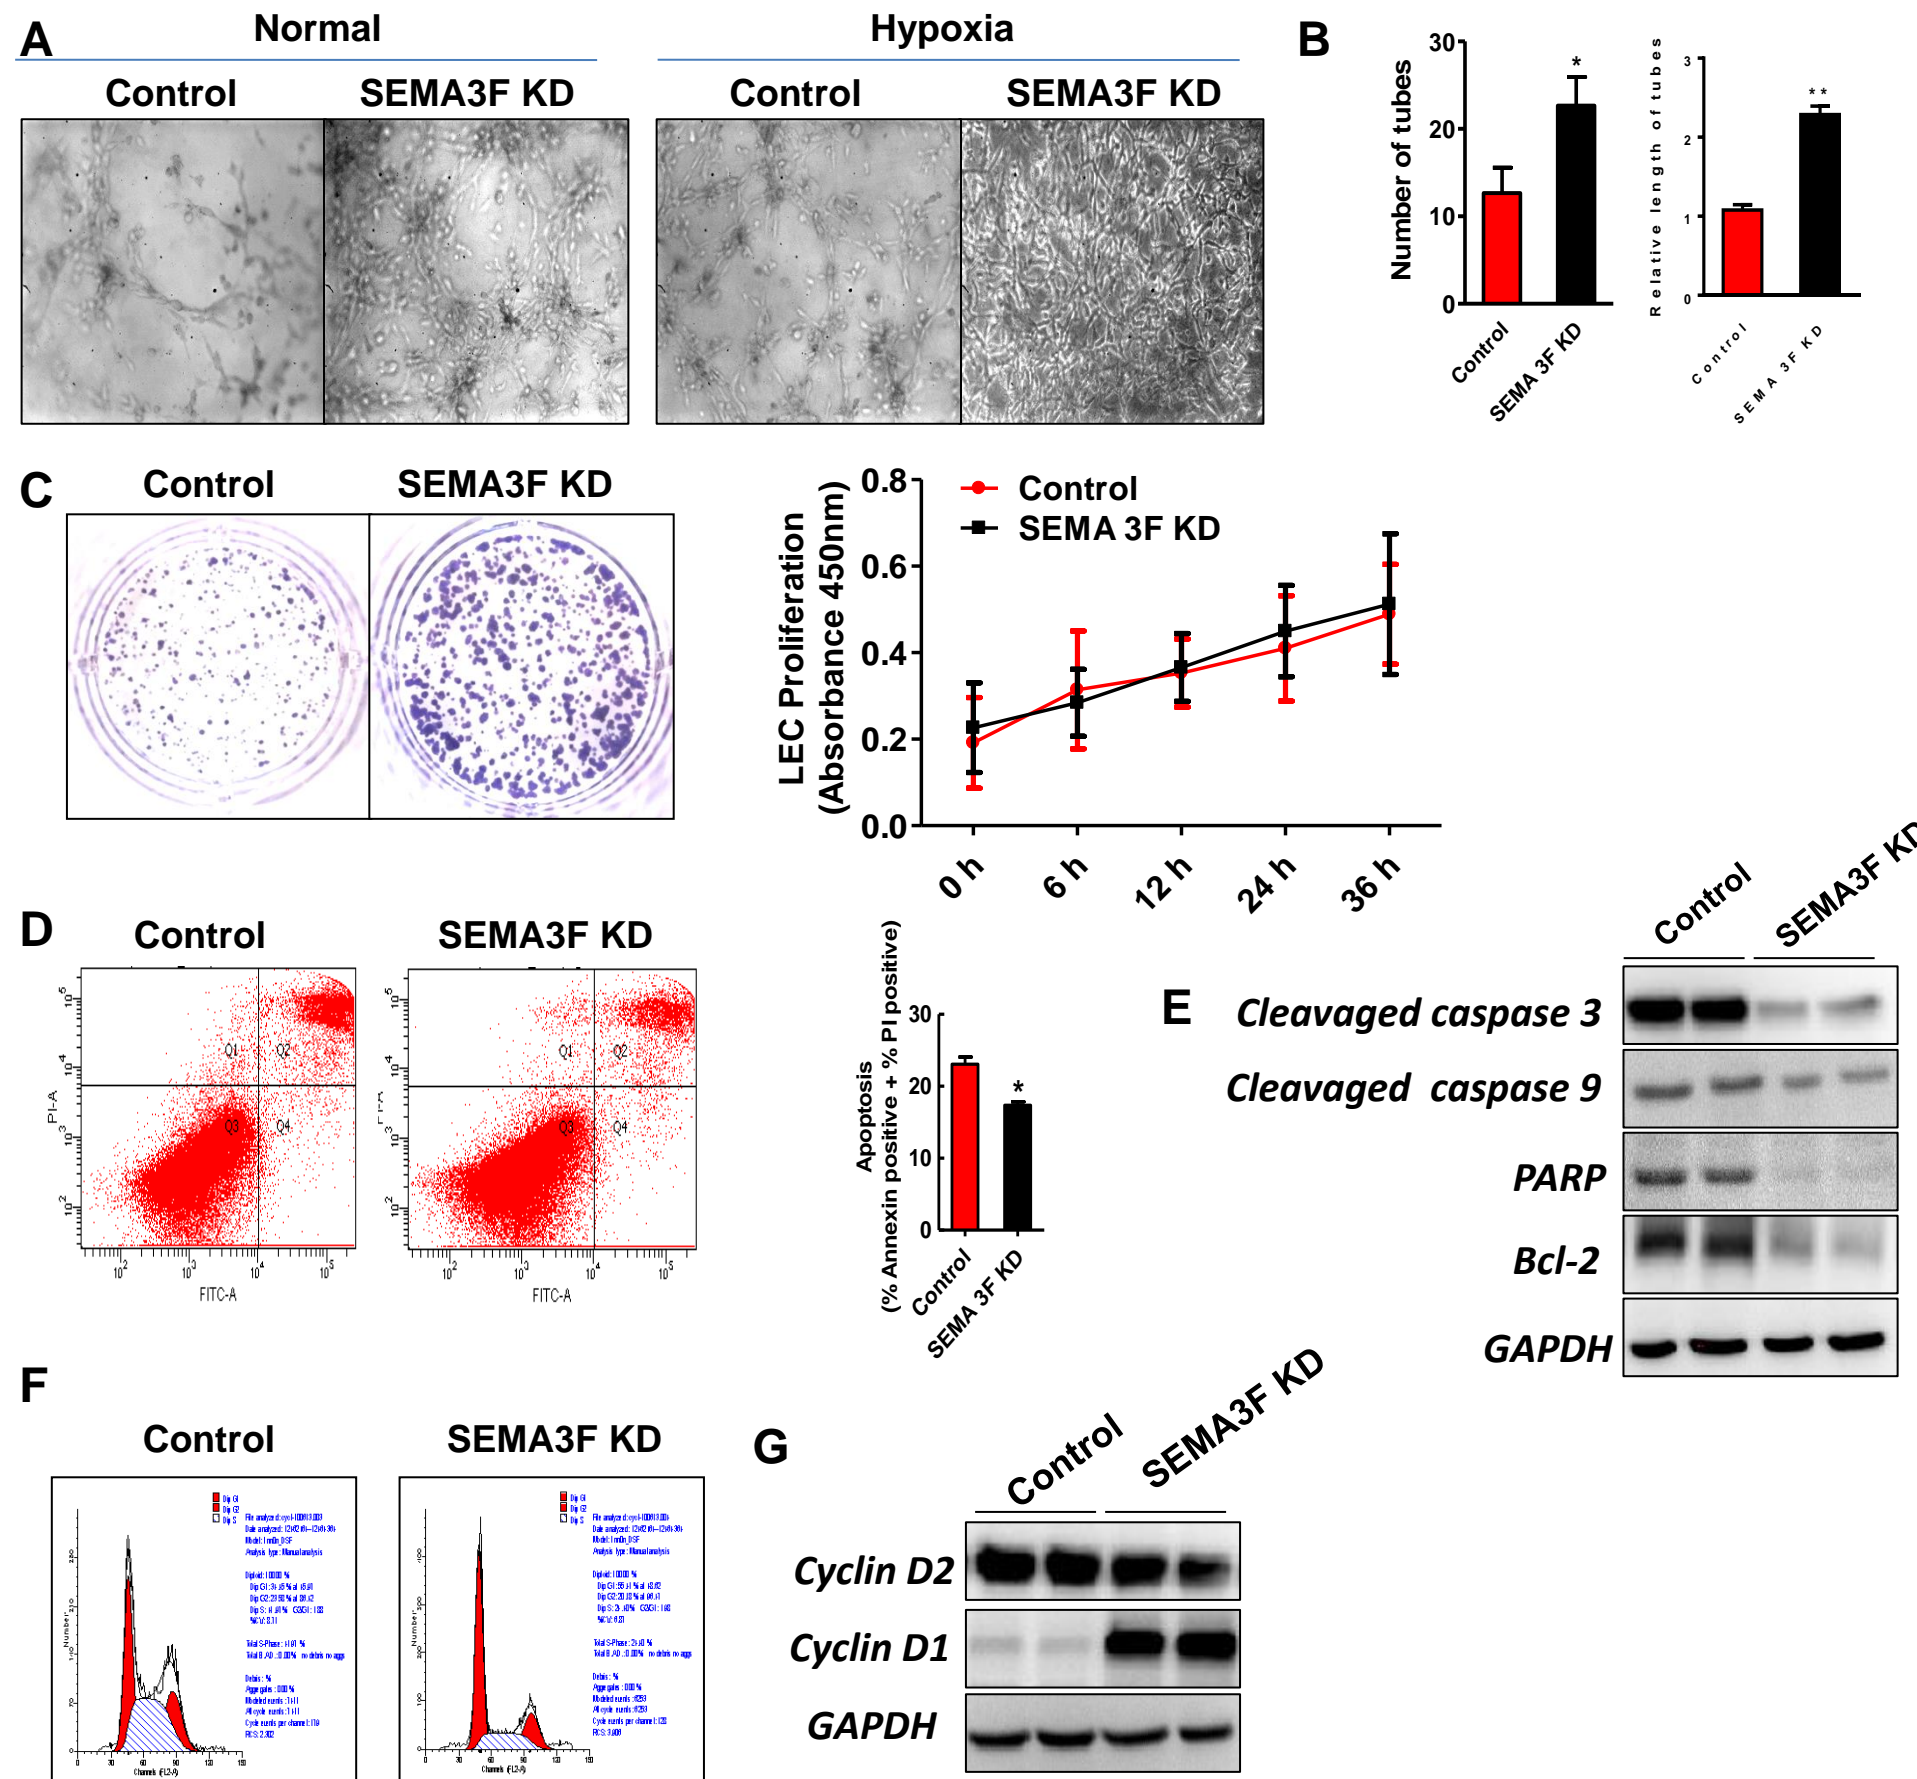



**Figure 2**

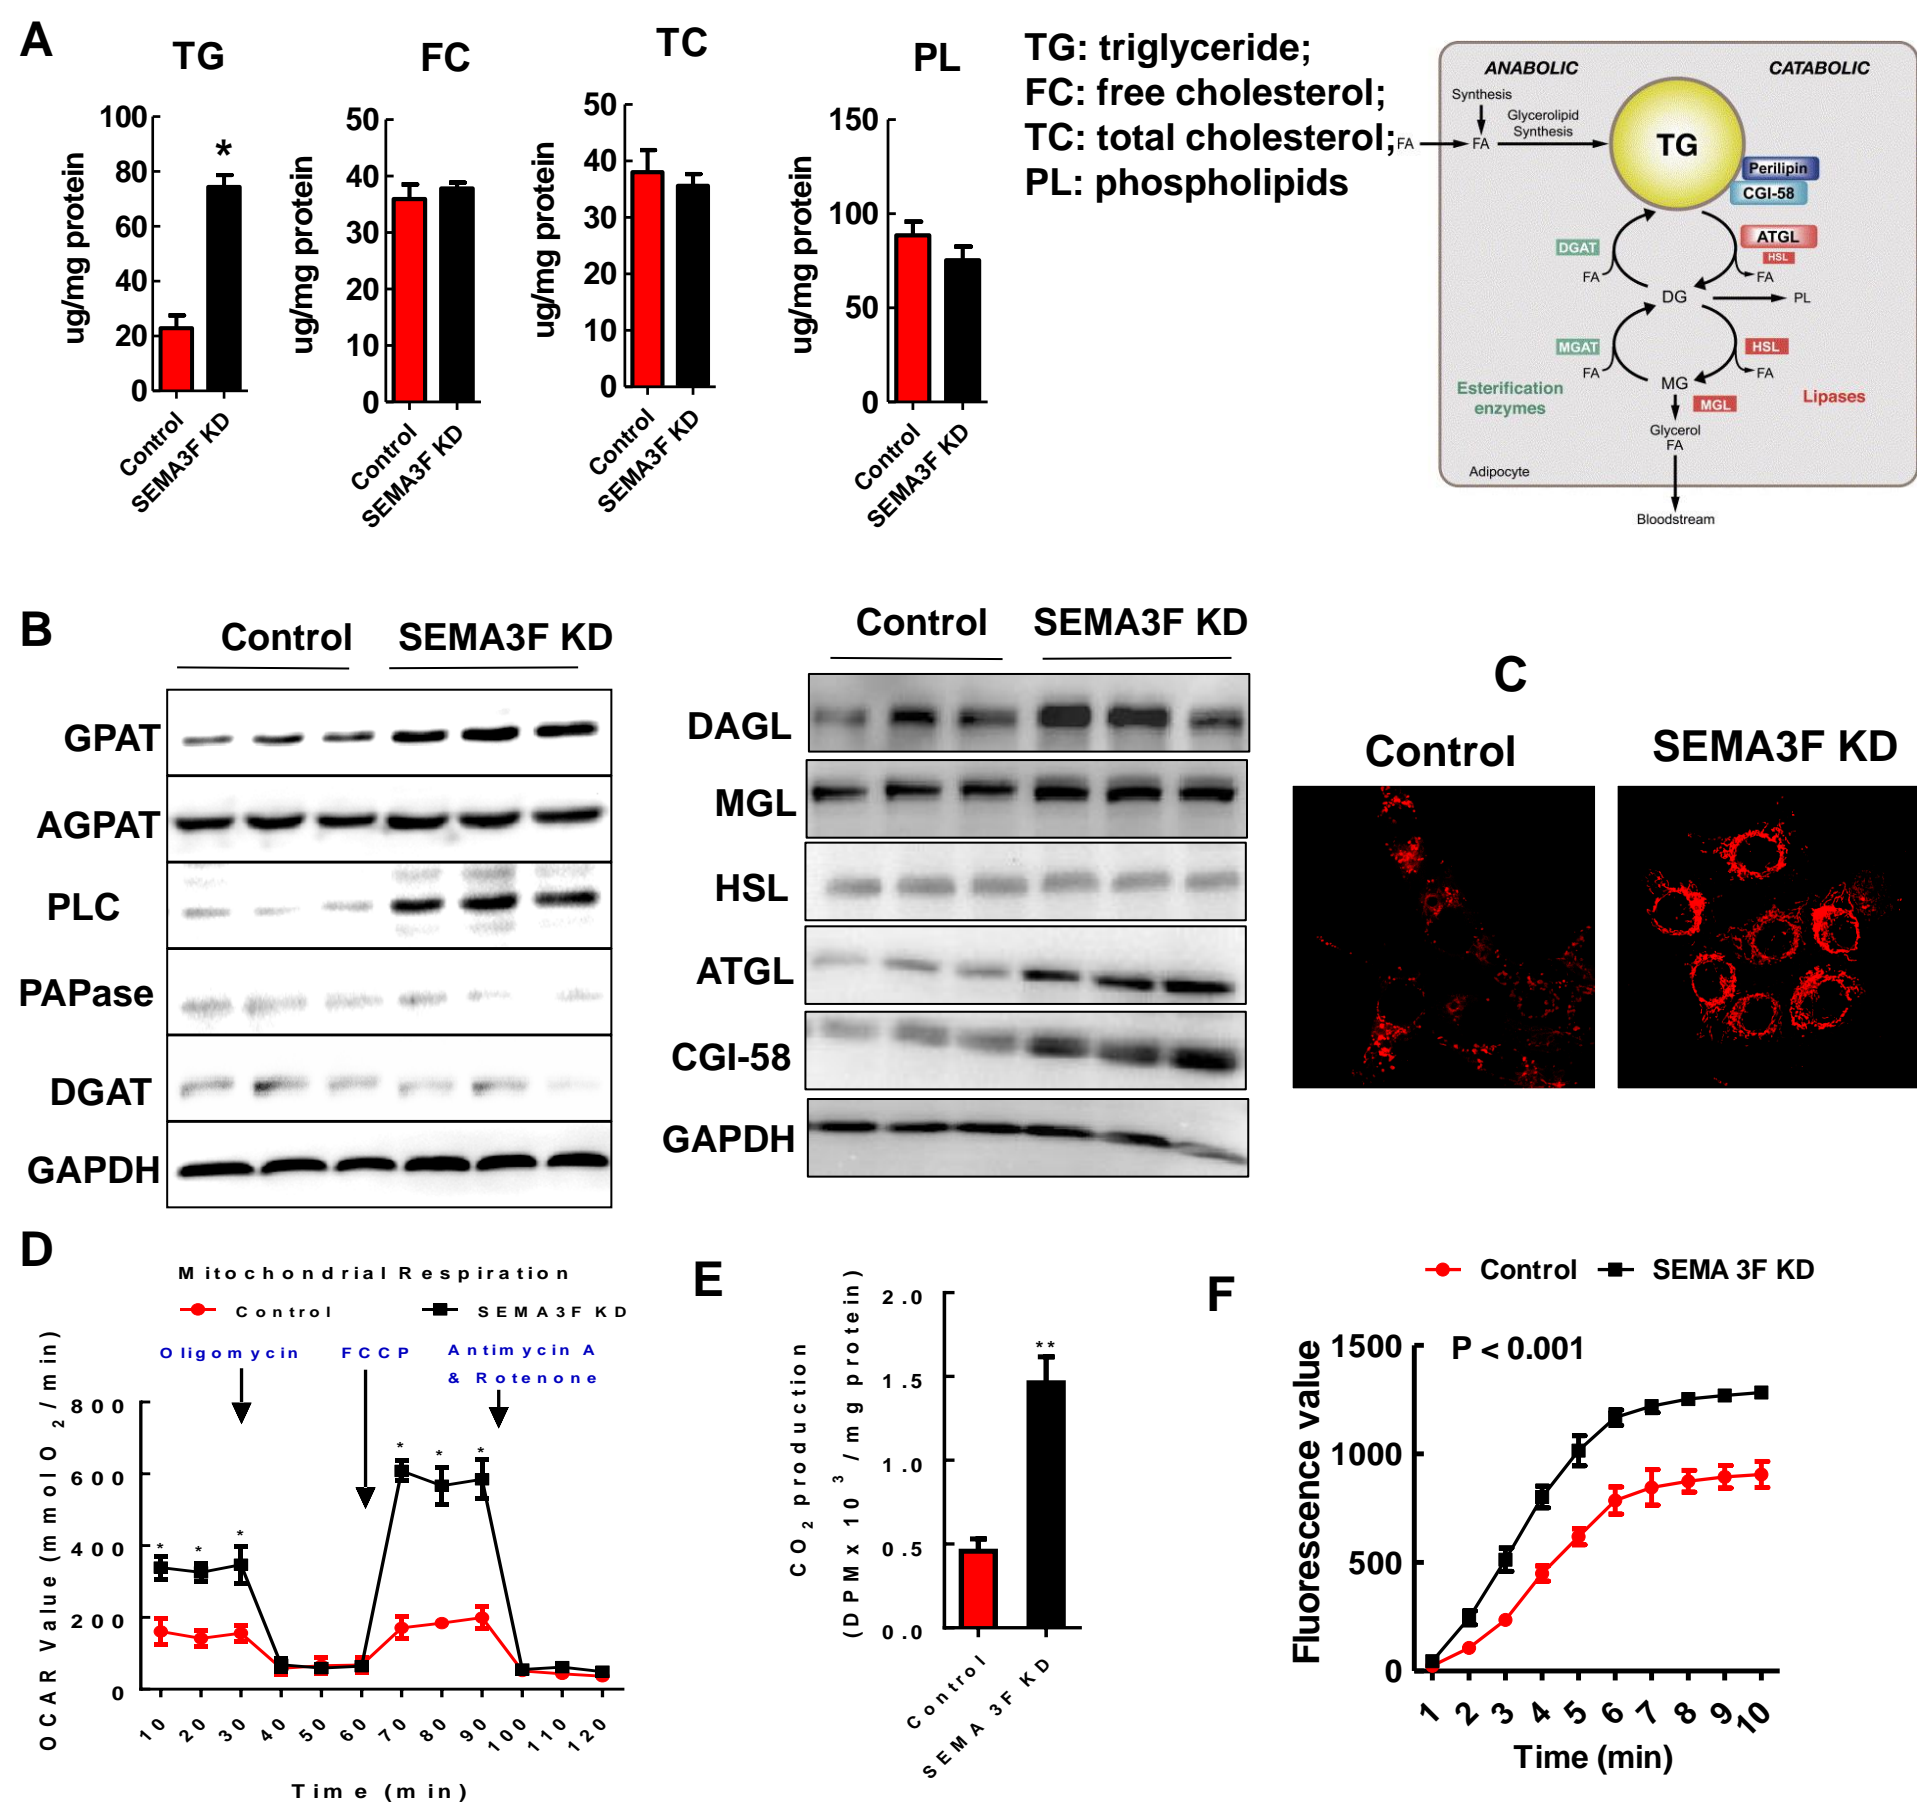

Figure 3

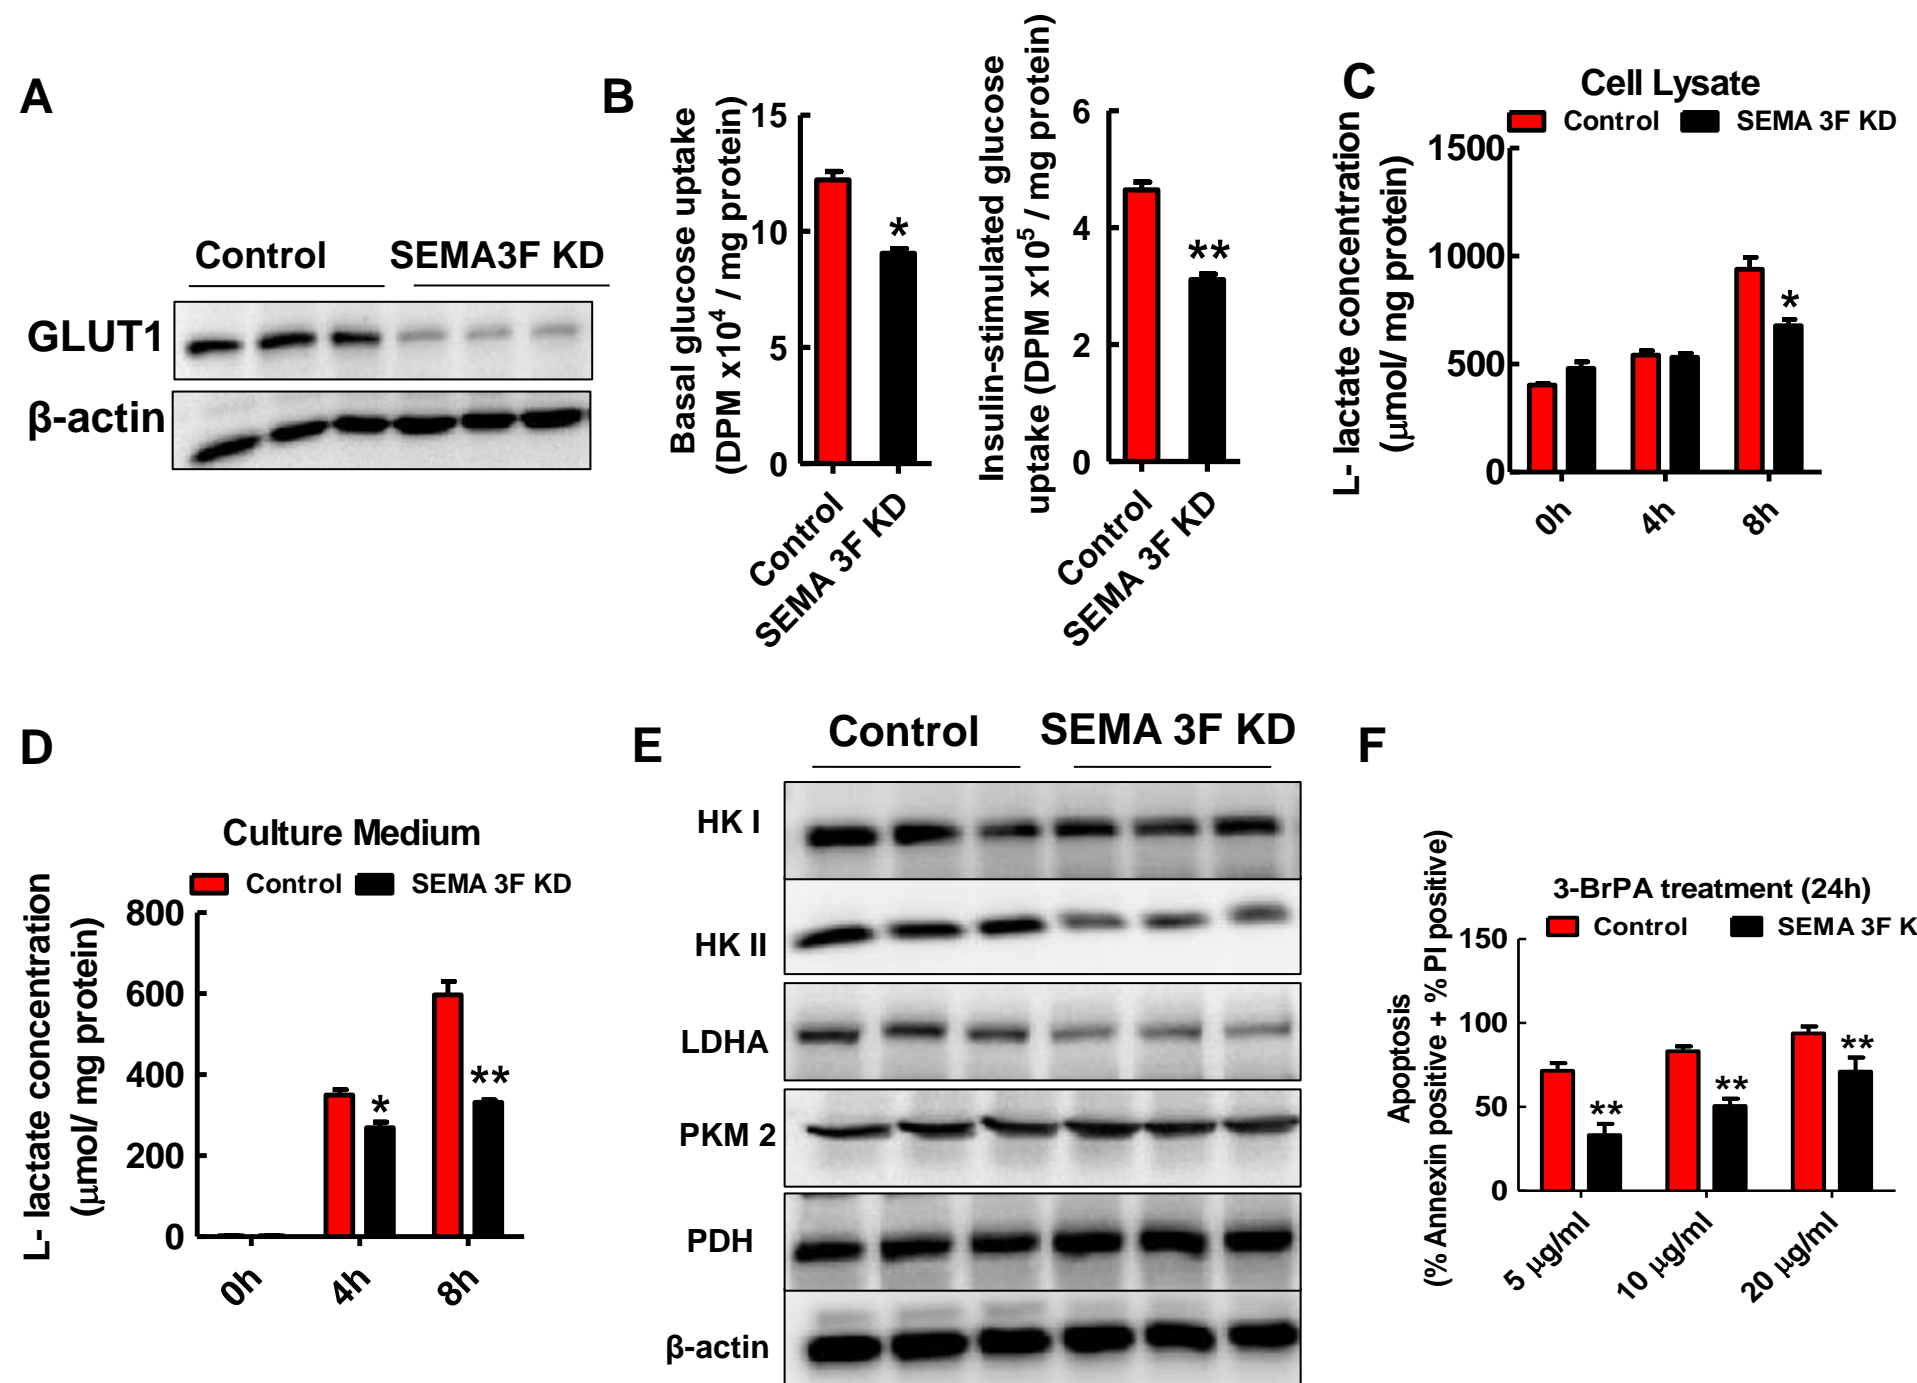

**Figure 4**

**A**

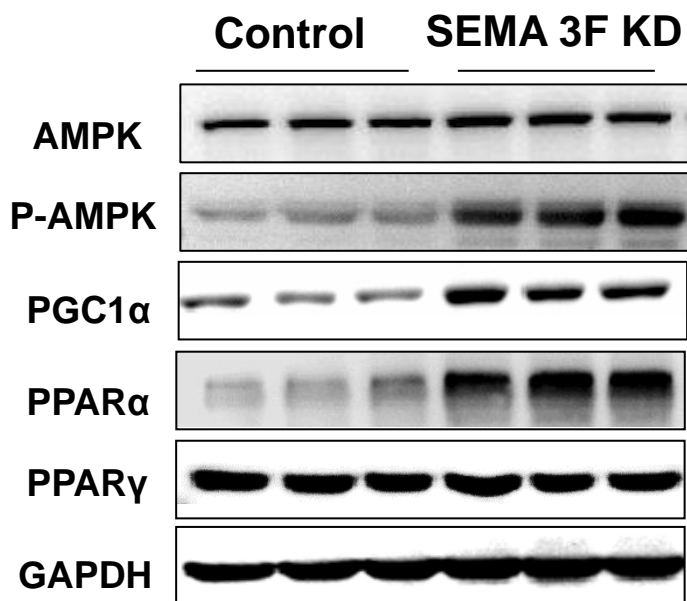

**B**

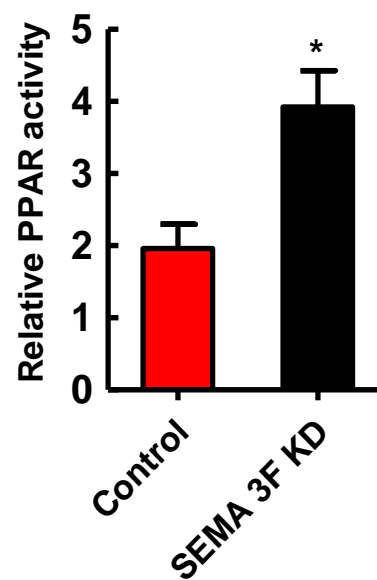

**C**

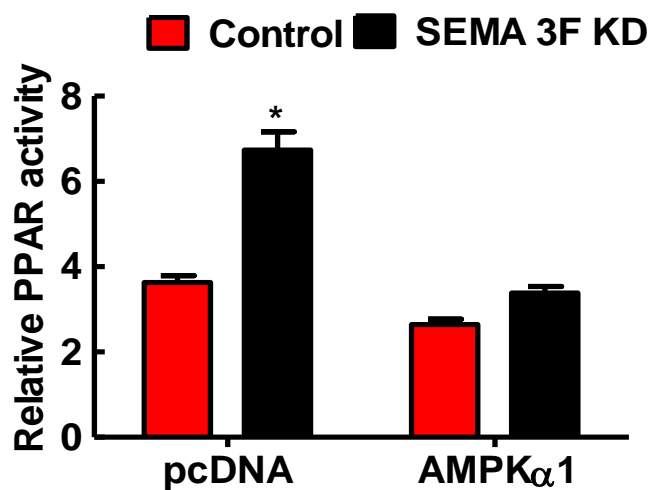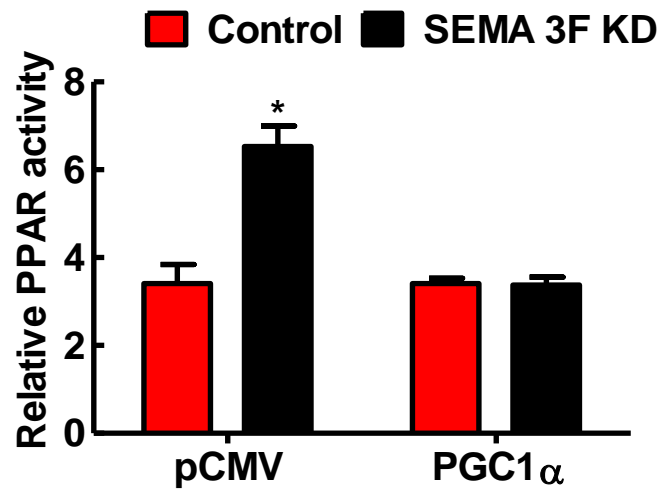

**D**

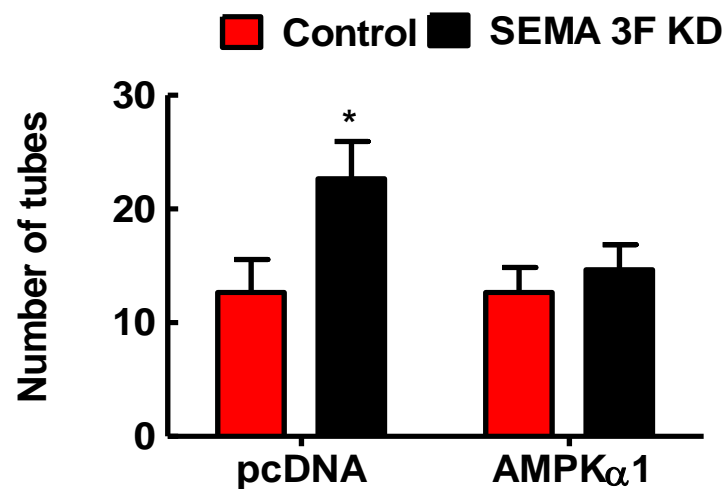

**E**

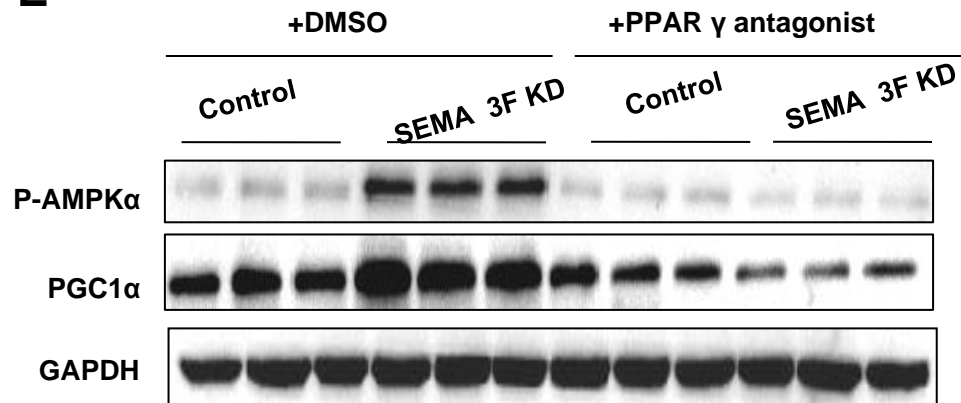

**Figure 5**

**A**

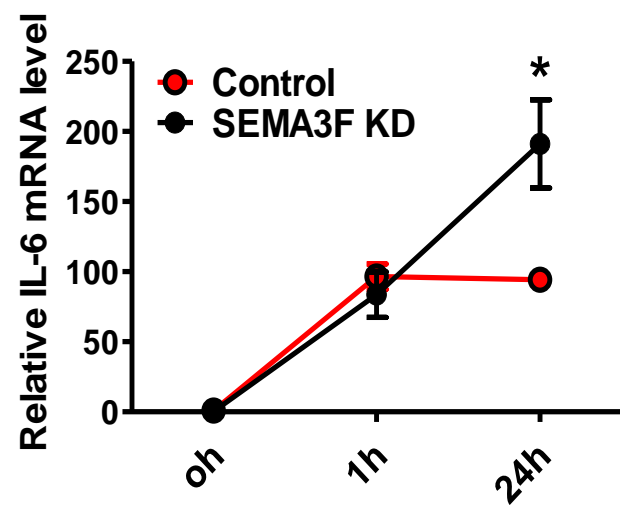

**B**

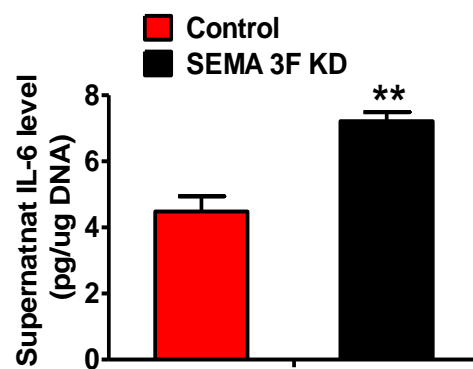

**C**

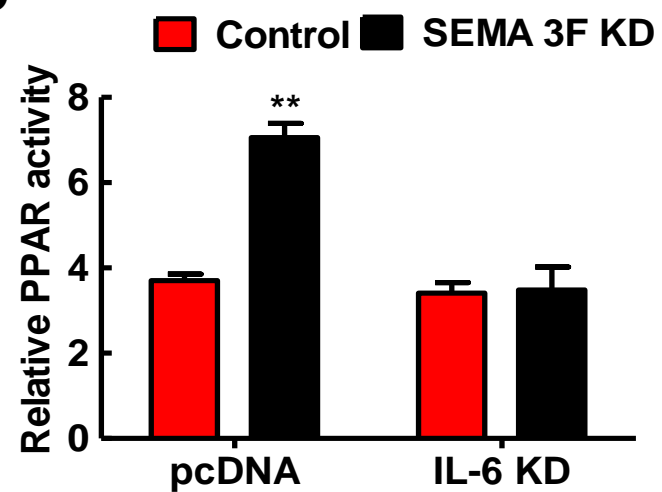

**D**

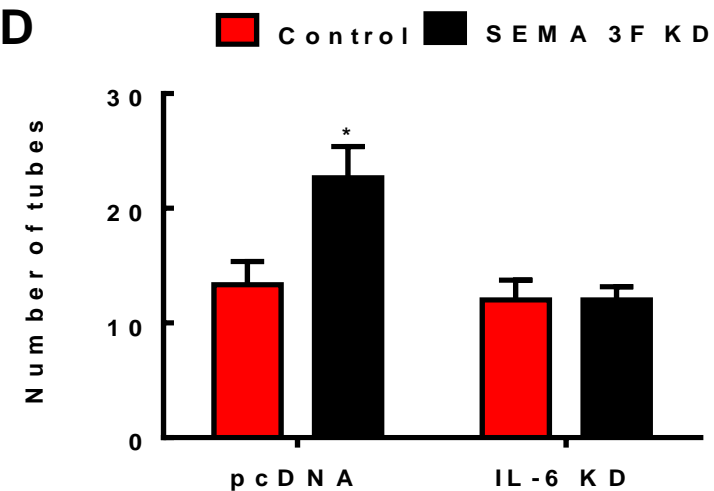

**E**

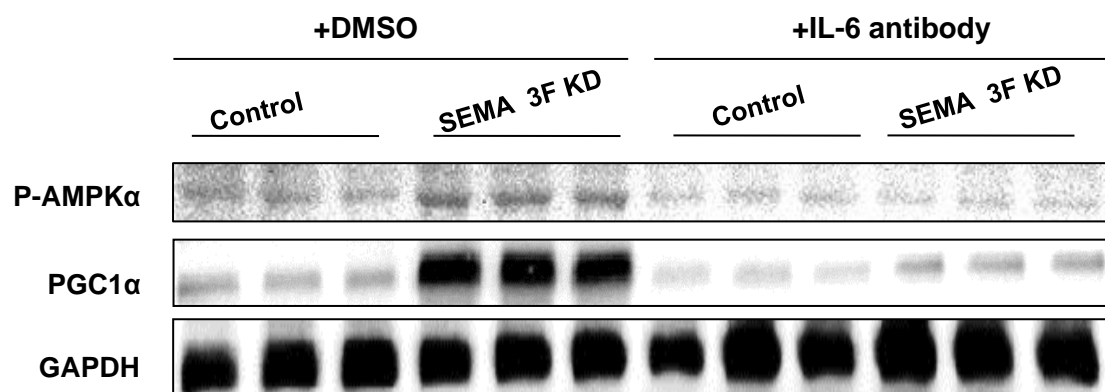

Figure 6

A

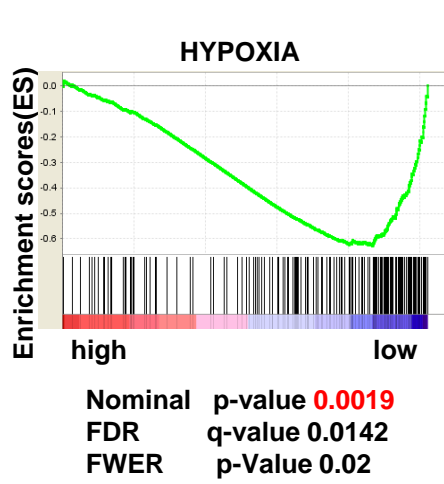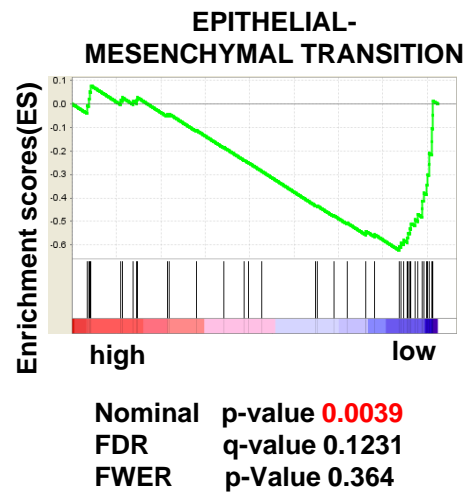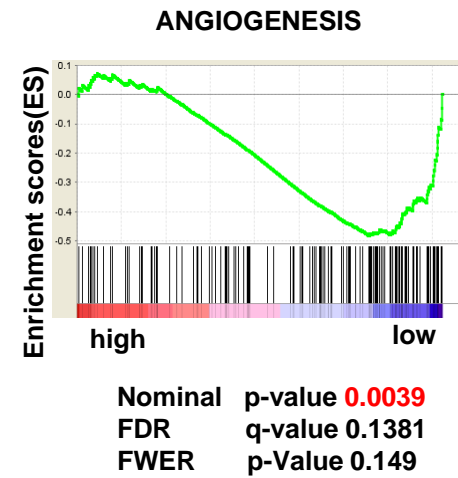

B

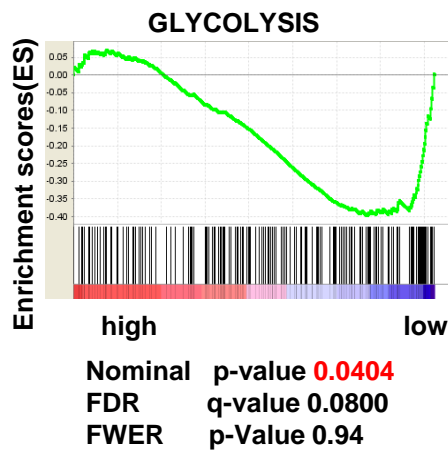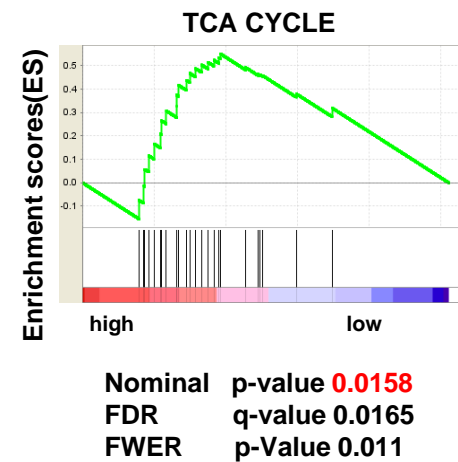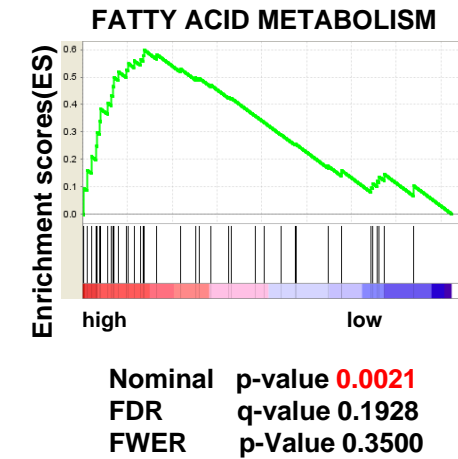

C

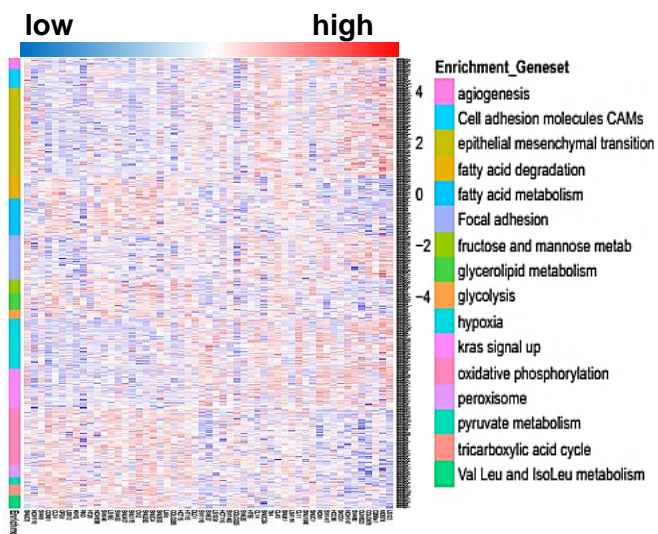

# Supplementary Figure1

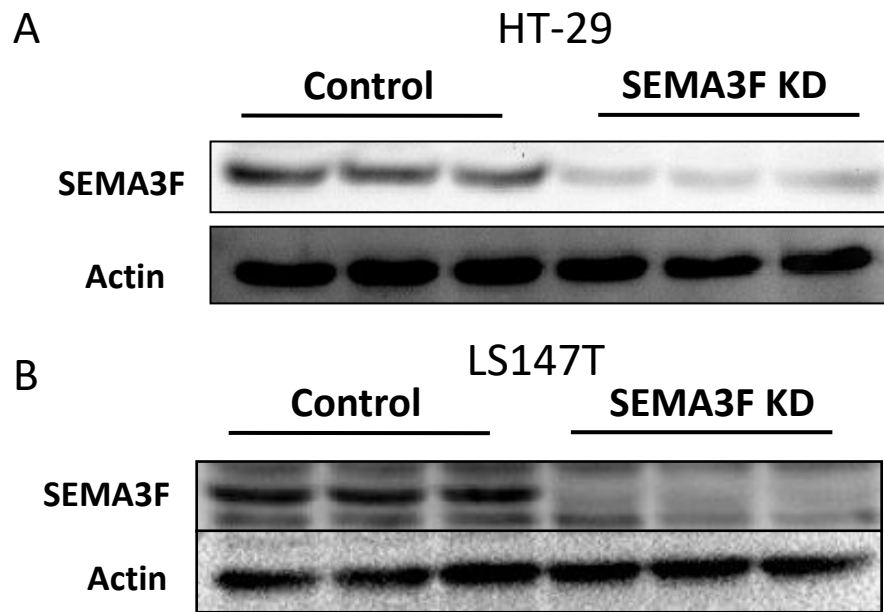

Source: http://biorxiv.org/content/10.1101/869644v1.full.pdf
